# Supplementary material for: Complex Patterns of Genomic Admixture within Southern Africa
Source: PubMed Central journal article supplement (PMC3597481; doi:10.1371/journal.pgen.1003309), 2013-03-14
Supplement: pgen.1003309.s001.pdf [file pgen.1003309.s001.pdf]

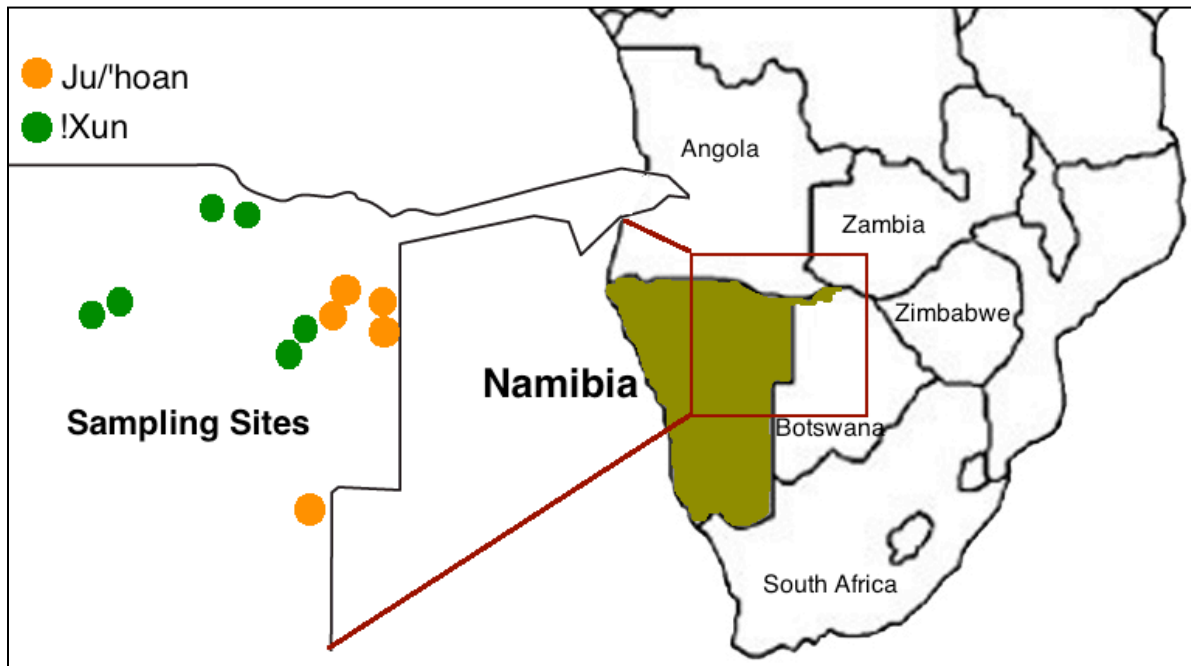

**Figure S1. Geographical locations of Khoesan sampling sites included in this study.** Study subjects were recruited from 11 locations across the north-western geographical region of Namibia and classified as either Ju/'hoan (orange, n=21) or !Xun (green, n=14). IBD allele sharing resulted in the exclusion of two Ju/'hoan from our study as a result of possible relatedness (total n=19).
