# Supplementary material for: Complex Patterns of Genomic Admixture within Southern Africa
Source: PubMed Central journal article supplement (PMC3597481; doi:10.1371/journal.pgen.1003309), 2013-03-14
Supplement: pgen.1003309.s005.pdf [file pgen.1003309.s005.pdf]

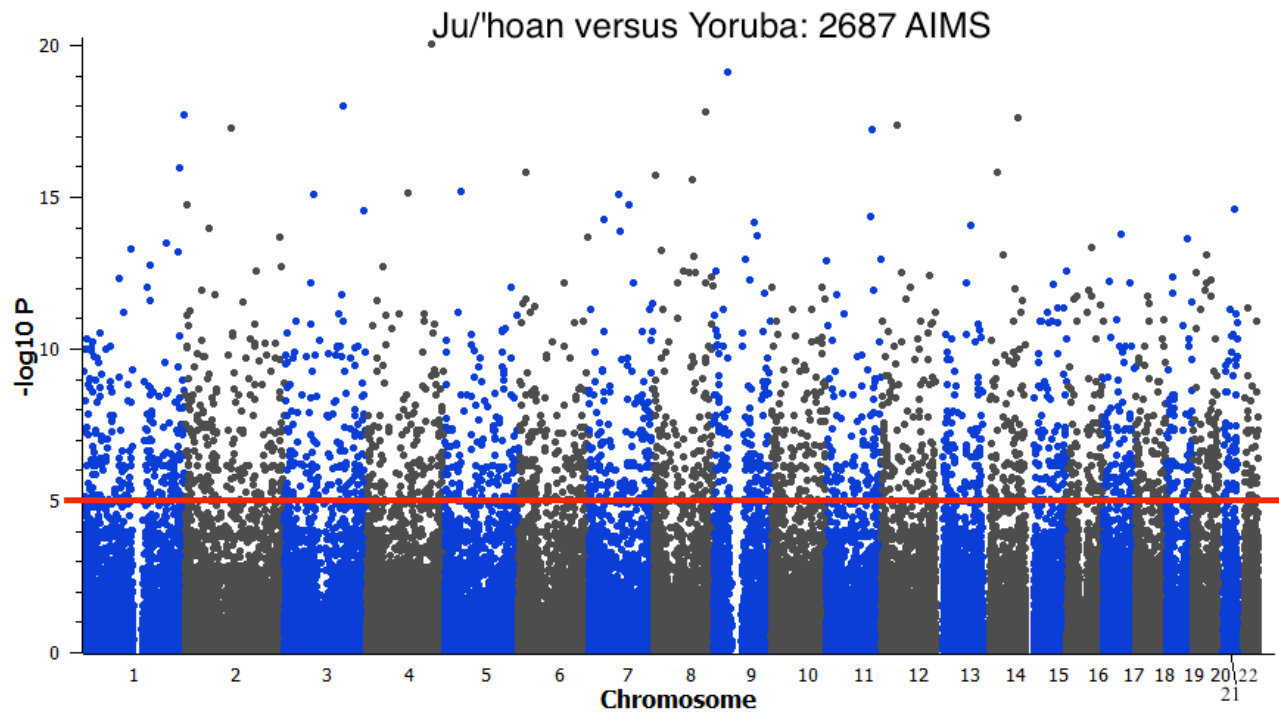

**Figure S5. Manhattan plot analysis for Ancestry Informative Marker (AIM) identification.** A total of 70,733 LD-pruned Illumina Omni-quad 1M array markers were used to identify 2687 AIMS distinguishing the Ju/'hoan from our study (n=19) to the Illumina iControl database Yoruba (n=90), defined as a significant allele frequency difference between these population identifiers at  $-\log_{10} P > 5$ .
