# Supplementary material for: Complex Patterns of Genomic Admixture within Southern Africa
Source: PubMed Central journal article supplement (PMC3597481; doi:10.1371/journal.pgen.1003309), 2013-03-14
Supplement: pgen.1003309.s006.pdf [file pgen.1003309.s006.pdf]

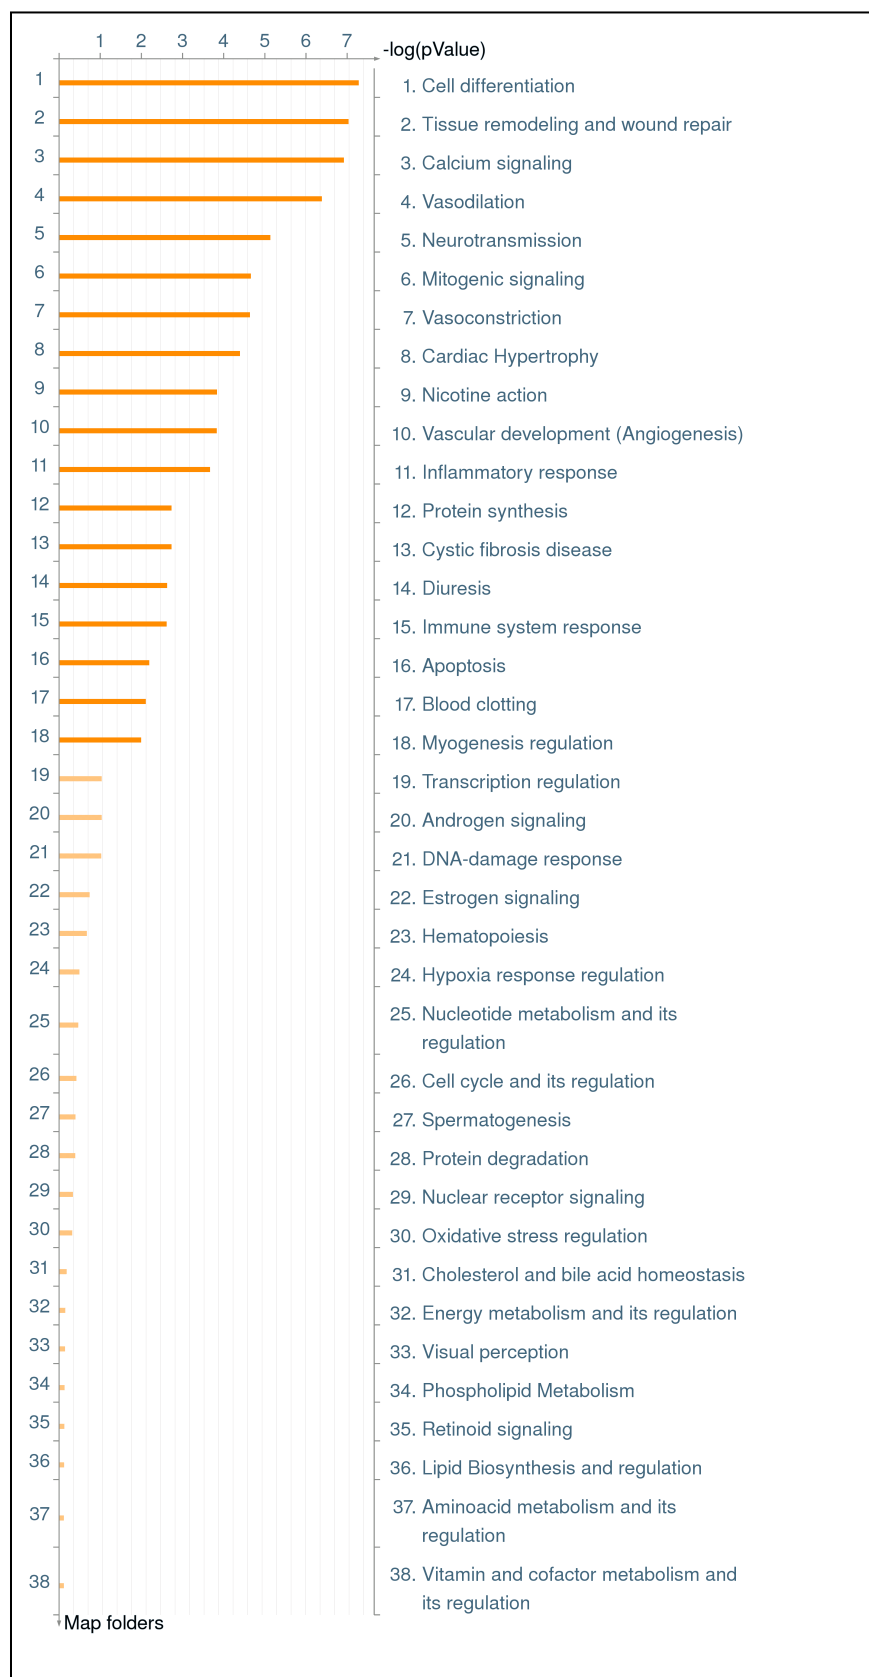

**Figure S6. Significantly enriched biologically relevant pathways of genes that distinguish Ju/'hoan and Yoruba.** Significant ancestry informative markers that distinguish the hunter-gatherer Ju/'hoan in our study from a representative of agriculturally-defined Yoruba, defined by a  $-\log P$  value greater than 5, that are most significantly represented within genes grouped within biologically relevant pathways.
