# Supplementary material for: Complex Patterns of Genomic Admixture within Southern Africa
Source: PubMed Central journal article supplement (PMC3597481; doi:10.1371/journal.pgen.1003309), 2013-03-14
Supplement: pgen.1003309.s008.pdf [file pgen.1003309.s008.pdf]

**K=2**

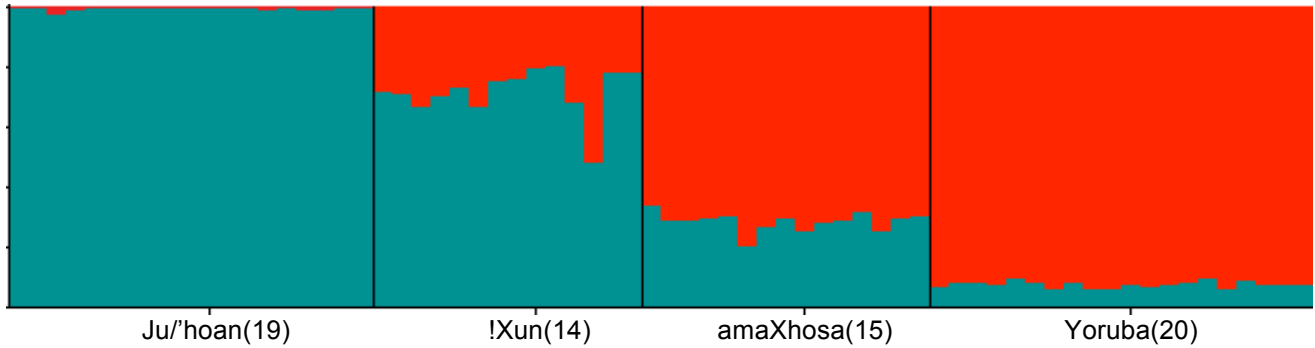

**K=3**

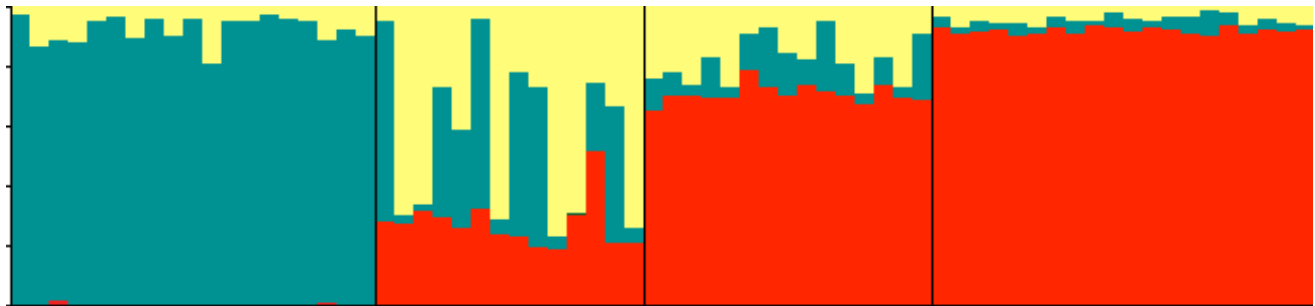

**Figure S8. Ju/'hoan and Yoruba ancestral contributions to the !Xun and amaXhosa.** STRUCTURE analysis using the 2687 Ju/'hoan-Yoruba AIMs assuming two (estimated log likelihood of probability of data -160813.9) and three (-161042.6) population clusters (10000 burn-ins and 20000 iterations). K=3 is also presented in the main text (**Figure 4A**).
