# Supplementary material for: Complex Patterns of Genomic Admixture within Southern Africa
Source: PubMed Central journal article supplement (PMC3597481; doi:10.1371/journal.pgen.1003309), 2013-03-14
Supplement: pgen.1003309.s010.pdf [file pgen.1003309.s010.pdf]

A

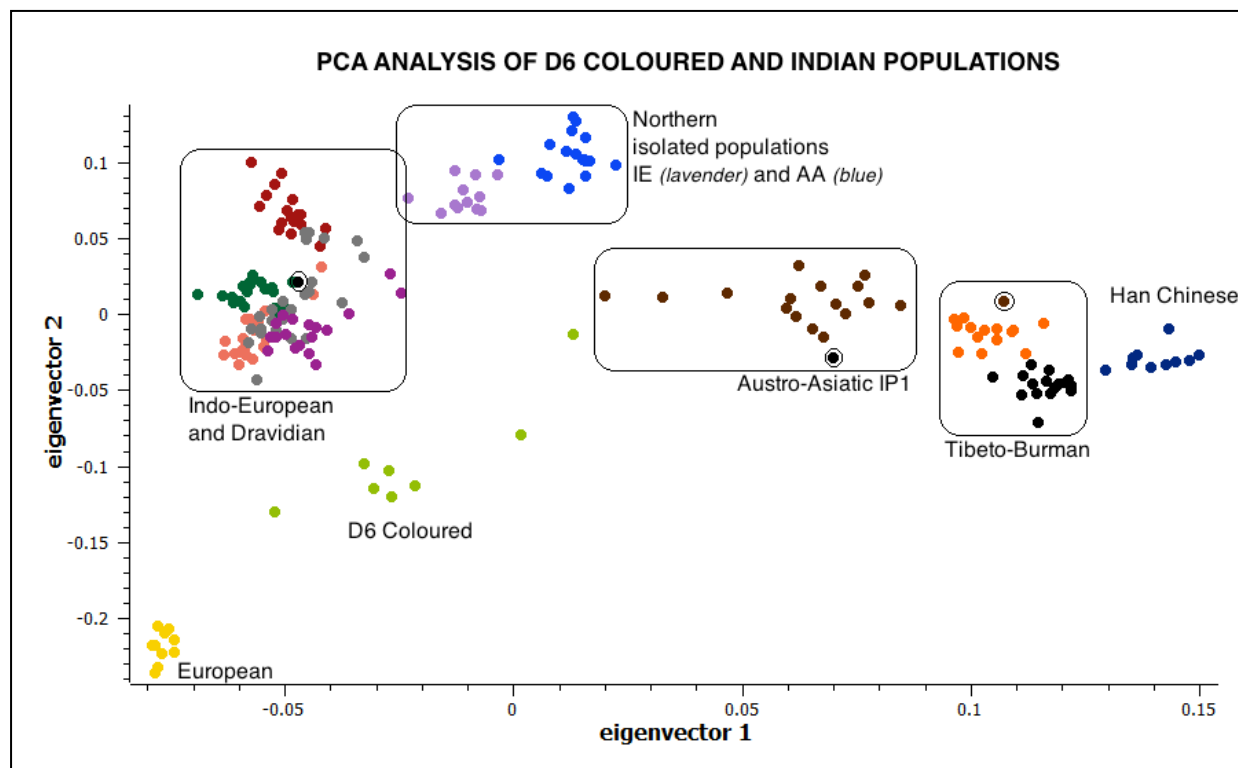

B

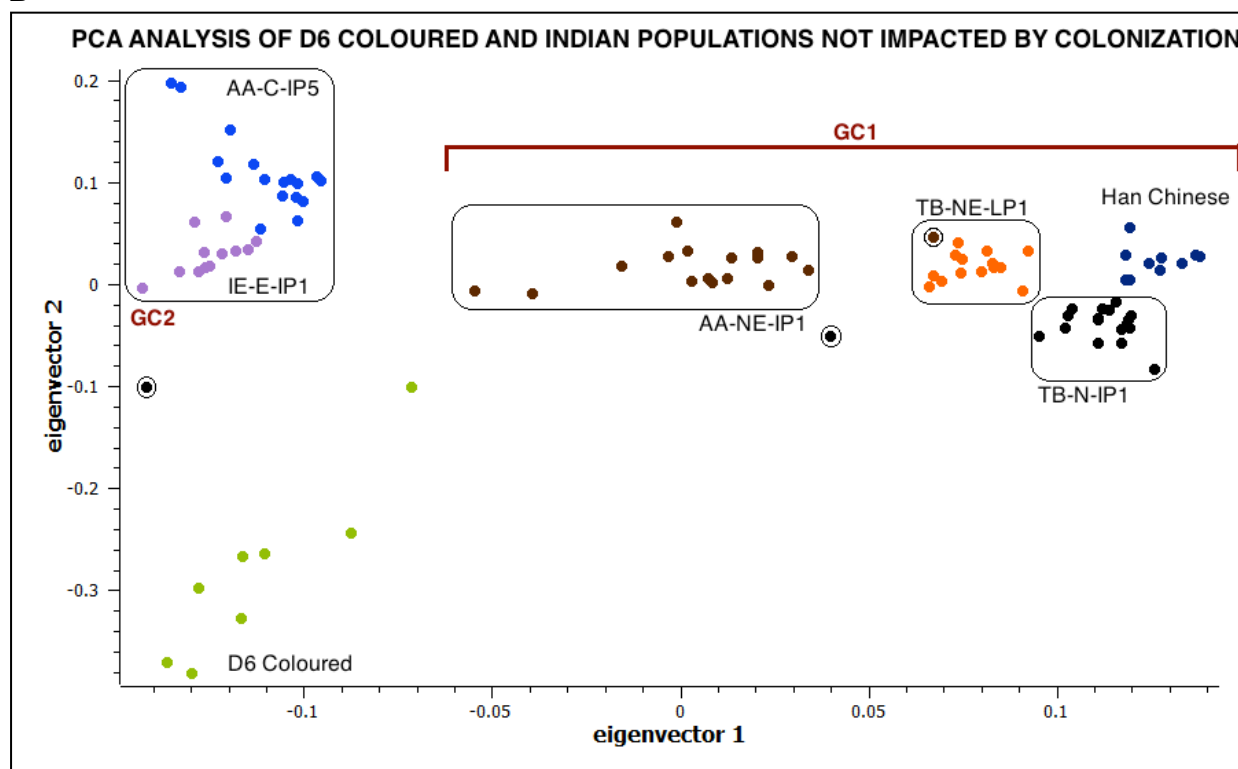

**C**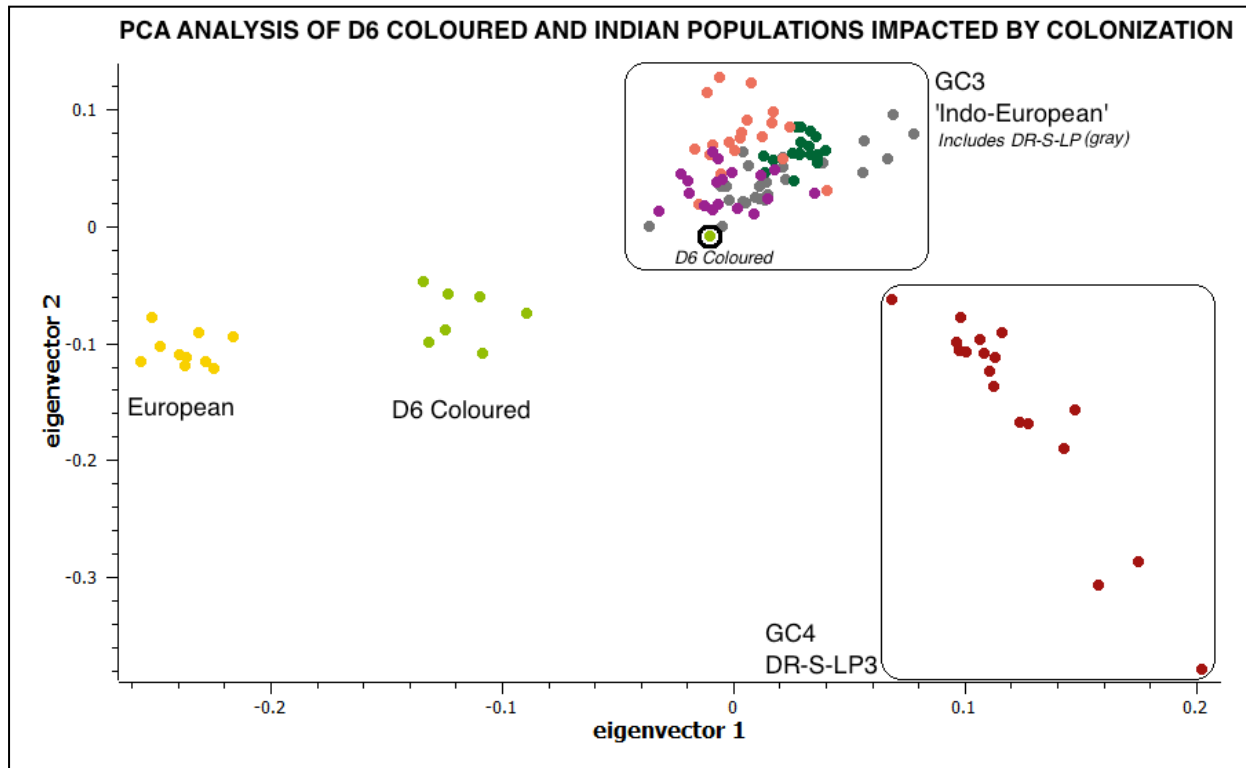

**Figure S10.** Principal component analysis (PCA) including 9,317 LD pruned autosomal markers for (A) D6 Coloured, Han Chinese, European and 10 Indian populations (B) D6 Coloured, Han Chinese and five Indian populations (GC1 and GC2) that were not impacted by colonization (C) D6 Coloured, European and five Indian populations (GC3 and GC4) that were impacted by colonization.
