# Supplementary material for: Complex Patterns of Genomic Admixture within Southern Africa
Source: PubMed Central journal article supplement (PMC3597481; doi:10.1371/journal.pgen.1003309), 2013-03-14
Supplement: pgen.1003309.s011.pdf [file pgen.1003309.s011.pdf]

**Table S1.** Mitochondrial DNA haplogroups screened.

| <b>mt-DNA Haplogroup</b> | <b>Markers</b>     |
|--------------------------|--------------------|
| L0                       | C3516A             |
| L0d                      | T4232C             |
| L0k                      | G4541A             |
| L0a                      | G5231A and G11176A |
| L2                       | T10115C            |
| L3'4                     | T3594C             |
| L3                       | A1018G             |
| M                        | C10400T            |
| N                        | G8701A and G10398A |
