# Supplementary material for: Complex Patterns of Genomic Admixture within Southern Africa
Source: PubMed Central journal article supplement (PMC3597481; doi:10.1371/journal.pgen.1003309), 2013-03-14
Supplement: pgen.1003309.s012.pdf [file pgen.1003309.s012.pdf]

Petersen DC, et al. **Complex Patterns of Genomic Admixture within Southern Africa**

**Table S2.** Y-chromosomal haplogroup and subclade representation within the Baster and Coloured sample from our study.

| Sample | Region | Y-haplogroup   | Marker | SNP        |
|--------|--------|----------------|--------|------------|
| COL5   | D6     | E1b1a1a1g1     | P277   | rs16980558 |
| COL7   | D6     | E1b1b1b1a2     | M183   | rs2032600  |
| COL4   | D6     | O1a2           | M50    | rs2032632  |
| COL6   | D6     | R1a1a1         | M417   | rs17316771 |
| COL1   | D6     | R1b1a2         | S10    | rs2058276  |
| COL3   | D6     | R1b1a2         | S10    | rs2058276  |
| COL8   | D6     | R1b1a2a1a1a    | M405   | rs16981293 |
| COL2   | D6     | R2             | PS4    | rs34551924 |
| COL14  | EC     | E1b1a1a1f1a    | M191   | rs2032590  |
| COL10  | EC     | E1b1a1a1g1     | P277   | rs16980558 |
| COL12  | EC     | E1b1a1a1g1     | P277   | rs16980558 |
| COL13  | EC     | J2b2           | M241   | rs8179022  |
| COL11  | EC     | N1c            | M46    | rs34442126 |
| COL9   | EC     | R1b1a2         | S10    | rs2058276  |
| COL15  | EC     | R1b1a2         | S10    | rs2058276  |
| COL21  | NC     | E2b            | M54    | rs2032620  |
| COL18  | NC     | G2a3           | S126   | rs34134567 |
| COL17  | NC     | I2a2a          | P219   | rs17221964 |
| COL20  | NC     | R1a1a1         | M417   | rs17316771 |
| COL19  | NC     | R1b1a2a1a1a5c1 | S170   | rs34283263 |
| COL16  | NC     | R2             | PS4    | rs34551924 |
| BAS10  | REH    | E1b1a1a1g1     | P277   | rs16980558 |
| BAS5   | REH    | I2a            | L460   | rs7892855  |
| BAS13  | REH    | I2a2a          | P219   | rs17221964 |
| BAS4   | REH    | J              | S34    | rs17316547 |
| BAS2   | REH    | R1a1a1         | M417   | rs17316771 |
| BAS9   | REH    | R1a1a1         | M417   | rs17316771 |
| BAS12  | REH    | R1b1a2         | S10    | rs2058276  |
| BAS1   | REH    | R1b1a2a1a1a    | M405   | rs16981293 |
| BAS6   | REH    | R1b1a2a1a1a    | M405   | rs16981293 |
| BAS8   | REH    | R1b1a2a1a1a5c1 | S170   | rs34283263 |
| BAS3   | REH    | R1b1a2a1a1b3   | S28    | rs1236440  |
| BAS7   | REH    | R1b1a2a1a1b3   | S28    | rs1236440  |
| BAS11  | REH    | R2             | PS4    | rs34551924 |

COL, Coloured; BAS, Baster

D6, District Six; EC, Eastern Cape; NC, Northern Cape and REH, Rehoboth
