# Supplementary material for: Complex Patterns of Genomic Admixture within Southern Africa
Source: PubMed Central journal article supplement (PMC3597481; doi:10.1371/journal.pgen.1003309), 2013-03-14
Supplement: pgen.1003309.s013.pdf [file pgen.1003309.s013.pdf]

**Table S3.** Multiple regression GAMOVA defines the contribution of variation explained by population identifiers.

| Population identifier        | N   | Cumulative PVE | P-value | Ancestral representation |
|------------------------------|-----|----------------|---------|--------------------------|
| European                     | 175 | 0.074          | < 0.001 | European                 |
| Han Chinese                  | 44  | 0.117          | < 0.001 | Asian                    |
| Yoruba                       | 90  | 0.132          | < 0.001 | African non-Khoesan      |
| <b>Ju/'hoan</b> (this study) | 19  | 0.141          | < 0.001 | African Khoesan          |
| Hadza                        | 17  | 0.15           | < 0.001 | -                        |
| #Khomani                     | 31  | 0.157          | < 0.001 | -                        |
| <b>Baster</b> (this study)   | 30  | 0.165          | < 0.001 | -                        |
| Mbuti                        | 13  | 0.172          | < 0.001 | -                        |
| Biaka                        | 22  | 0.179          | < 0.001 | -                        |
| <b>!Xun</b> (this study)*    | 13  | 0.185          | < 0.001 | -                        |
| <b>Coloured</b> (this study) | 25  | 0.19           | < 0.001 | -                        |
| Sandawe                      | 28  | 0.195          | < 0.001 | -                        |
| Maasai                       | 30  | 0.198          | < 0.001 | -                        |
| Luhya                        | 36  | 0.201          | < 0.001 | -                        |
| <b>amaXhosa</b> (this study) | 15  | 0.202          | 1       | -                        |

\* Recently admixed individual (NF2) removed from analysis.
