# Supplementary material for: Complex Patterns of Genomic Admixture within Southern Africa
Source: PubMed Central journal article supplement (PMC3597481; doi:10.1371/journal.pgen.1003309), 2013-03-14
Supplement: pgen.1003309.s015.pdf [file pgen.1003309.s015.pdf]

**Table S5.** Alleles with a highly significant  $-\log_{10}P > 14$  Ju/'hoan versus 'Yoruba population-specific association.

| -log <sub>10</sub> P                 | SNP        | Chr | Position <sup>1</sup>    | Gene                   | Location   | Genetic Association Class (Phenotype) <sup>2</sup>                                                                        | Pan allele     | Allele frequencies                       |                        |                      |                                                 |                      |                      |
|--------------------------------------|------------|-----|--------------------------|------------------------|------------|---------------------------------------------------------------------------------------------------------------------------|----------------|------------------------------------------|------------------------|----------------------|-------------------------------------------------|----------------------|----------------------|
|                                      |            |     |                          |                        |            |                                                                                                                           |                | Southern African Populations (our study) |                        |                      | HapMap populations (Illumina iControl Database) |                      |                      |
|                                      |            |     |                          |                        |            |                                                                                                                           |                | Ju/'hoan (n=19)                          | !Xun (n=14)            | Xhosa (n=15)         | Yoruba (n=90)                                   | Asian (n=44)         | European (n=175)     |
| Ethnic / Geographical classification |            |     |                          |                        |            |                                                                                                                           | <i>Khoesan</i> |                                          | <i>African</i>         |                      | <i>Non-African</i>                              |                      |                      |
| Subsistence based classification     |            |     |                          |                        |            |                                                                                                                           | <i>Forager</i> |                                          | <i>Agriculturalist</i> |                      |                                                 |                      |                      |
| 20.03726772                          | rs2594762  | 4   | 159102581<br>[158883131] | -                      | -          | -                                                                                                                         | T              | T(0.750)<br>C(0.250)                     | T(0.143)<br>C(0.857)   | T(0.100)<br>C(0.900) | T(0.006)<br>C(0.994)                            | T(0.023)<br>C(0.977) | T(0.109)<br>C(0.891) |
| 19.12504517                          | rs2477414  | 9   | 33544121<br>[33554121]   | <i>ANKRD18B</i>        | Intronic   | None                                                                                                                      | T              | T(0.658)<br>C(0.342)                     | T(0.464)<br>C(0.536)   | T(0.233)<br>C(0.767) | <b>C(1)</b>                                     | T(0.045)<br>C(0.955) | T(0.129)<br>C(0.871) |
| 18.01377702                          | rs12695746 | 3   | 143130049<br>[141647359] | <i>ATP1B3</i>          | Downstream | None                                                                                                                      | G              | G(0.500)<br>T(0.500)                     | G(0.714)<br>T(0.286)   | G(0.900)<br>T(0.100) | <b>G(1)</b>                                     | G(0.795)<br>T(0.205) | G(0.854)<br>T(0.146) |
| 17.81036587                          | rs283722   | 8   | 128379719<br>[128310537] | <i>LOC727677</i>       | Intronic   | None                                                                                                                      | G              | G(0.368)<br>A(0.632)                     | G(0.786)<br>A(0.214)   | G(0.867)<br>A(0.133) | G(0.989)<br>A(0.011)                            | G(0.977)<br>A(0.023) | <b>G(1)</b>          |
| 17.73368261                          | rs12410304 | 1   | 243885443<br>[245818820] | <i>KIF26B</i>          | Intronic   | <i>Chemical dependency (tobacco use)</i>                                                                                  | G              | G(0.421)<br>A(0.579)                     | G(0.536)<br>A(0.464)   | G(0.867)<br>A(0.133) | <b>G(1)</b>                                     | G(0.602)<br>A(0.398) | G(0.943)<br>A(0.057) |
| 17.62553771                          | rs13379392 | 14  | 87408696<br>[88338943]   | <i>GALC</i>            | Intronic   | <i>Neurological (Krabbe disease)</i>                                                                                      | G              | G(0.526)<br>T(0.474)                     | G(0.357)<br>T(0.643)   | G(0.033)<br>T(0.967) | G(0.011)<br>T(0.989)                            | G(0.057)<br>T(0.943) | G(0.425)<br>T(0.575) |
| 17.39638358                          | rs2723269  | 12  | 38916054<br>[40629787]   | <i>LRRK2</i>           | Intronic   | <i>Chemical dependency (tobacco use); Neurological (Parkinson's disease); Immune (Crohn disease); Infection (Leprosy)</i> | A              | A(0.368)<br>T(0.632)                     | A(0.786)<br>T(0.214)   | A(0.967)<br>T(0.033) | A(0.994)<br>T(0.006)                            | A(0.636)<br>T(0.364) | A(0.937)<br>T(0.063) |
| 17.25799595                          | rs13032068 | 2   | 111539508<br>[111823037] | <i>ACOXL</i>           | Intronic   | <i>Cancer (Chronic lymphocytic leukemia)</i>                                                                              | A              | A(0.632)<br>G(0.368)                     | A(0.214)<br>G(0.786)   | A(0.133)<br>G(0.867) | A(0.017)<br>G(0.983)                            | A(0.091)<br>G(0.909) | A(0.095)<br>G(0.905) |
| 17.23160021                          | rs10502172 | 11  | 112704356<br>[113199146] | <i>TTC12</i>           | Intronic   | <i>Chemical dependency (nicotine / alcohol dependency)</i>                                                                | C              | C(0.611)<br>T(0.389)                     | C(0.800)<br>T(0.200)   | C(0.750)<br>T(0.250) | <b>C(1)</b>                                     | C(0.943)<br>T(0.057) | C(0.549)<br>T(0.451) |
| 15.94274955                          | rs17753447 | 1   | 234748204<br>[236681581] | <i>LGALS8</i>          | 5'UTR      | None                                                                                                                      | A              | A(0.711)<br>G(0.289)                     | A(0.321)<br>G(0.679)   | A(0.200)<br>G(0.800) | A(0.044)<br>G(0.956)                            | A(0.045)<br>G(0.955) | A(0.169)<br>G(0.831) |
| 15.81839562                          | rs13216265 | 6   | 15925857<br>[15817878]   | -                      | -          | -                                                                                                                         | T              | T(0.806)<br>C(0.194)                     | T(0.500)<br>C(0.500)   | T(0.267)<br>C(0.733) | T(0.067)<br>C(0.933)                            | T(0.091)<br>C(0.909) | T(0.163)<br>C(0.837) |
| 15.80162901                          | rs12432055 | 14  | 35559090<br>[36489339]   | -                      | -          | -                                                                                                                         | C              | C(0.579)<br>T(0.421)                     | C(0.929)<br>T(0.071)   | C(0.967)<br>T(0.033) | <b>C(1)</b>                                     | C(0.898)<br>T(0.102) | C(0.954)<br>T(0.046) |
| 15.72915232                          | rs2552241  | 8   | 5841292<br>[5853884]     | -                      | -          | -                                                                                                                         | C              | C(0.237)<br>T(0.763)                     | C(0.286)<br>T(0.714)   | C(0.767)<br>T(0.233) | C(0.917)<br>T(0.083)                            | C(0.761)<br>T(0.239) | C(0.489)<br>T(0.511) |
| 15.59791193                          | rs6998580  | 8   | 94964119<br>[94894943]   | -                      | -          | -                                                                                                                         | T              | T(0.605)<br>C(0.395)                     | T(0.321)<br>C(0.679)   | T(0.067)<br>C(0.933) | T(0.022)<br>C(0.978)                            | T(0.080)<br>C(0.920) | T(0.423)<br>C(0.577) |
| 15.18605643                          | rs348609   | 5   | 40296686<br>[40260929]   | <i>U1</i> <sup>3</sup> | Upstream   | -                                                                                                                         | C              | C(0.316)<br>T(0.684)                     | C(0.714)<br>T(0.286)   | C(0.700)<br>T(0.300) | C(0.950)<br>T(0.050)                            | C(0.966)<br>T(0.034) | C(0.797)<br>T(0.203) |

|             |            |    |                          |                 |          |                                                                                                   |          |                  |                  |                  |                  |                  |                  |
|-------------|------------|----|--------------------------|-----------------|----------|---------------------------------------------------------------------------------------------------|----------|------------------|------------------|------------------|------------------|------------------|------------------|
| 15.14420001 | rs6839885  | 4  | 101917906<br>[101698883] | -               | -        | -                                                                                                 | <b>T</b> | T(0.393)C(0.607) | T(0.077)C(0.923) | <b>C(1)</b>      | <b>C(1)</b>      | T(0.102)C(0.898) | T(0.257)C(0.743) |
| 15.10634209 | rs10279013 | 7  | 72789825<br>[73151889]   | <i>ABHD11</i>   | Intronic | None                                                                                              | <b>C</b> | C(0.500)T(0.500) | C(0.750)T(0.250) | C(0.967)C(0.033) | C(0.989)T(0.011) | <b>C(1)</b>      | <b>C(1)</b>      |
| 15.07562289 | rs17005571 | 3  | 69390632<br>[69307942]   | <i>FRMD4B</i>   | Intronic | <i>Chemical dependency (tobacco use); Cardiovascular (Heart failure); Immune (Celiac disease)</i> | <b>T</b> | T(0.632)C(0.368) | T(0.643)C(0.357) | T(0.933)C(0.067) | <b>T(1)</b>      | T(0.875)C(0.125) | T(0.983)C(0.017) |
| 14.74817121 | rs4854190  | 2  | 3086042<br>[3107035]     | <i>AK095310</i> | Intronic | None                                                                                              | <b>G</b> | G(0.684)A(0.316) | G(0.893)A(0.107) | <b>G(1)</b>      | <b>G(1)</b>      | G(0.807)A(0.193) | G(0.920)A(0.080) |
| 14.74817121 | rs2132276  | 7  | 97664276<br>[97826340]   | <i>LMTK2</i>    | Intronic | <i>Cancer (Prostate cancer)</i>                                                                   | <b>G</b> | G(0.684)A(0.316) | G(0.786)A(0.214) | <b>G(1)</b>      | <b>G(1)</b>      | G(0.909)A(0.091) | G(0.454)A(0.546) |
| 14.60808907 | rs2836716  | 21 | 39157929<br>[40236059]   | -               | -        | -                                                                                                 | <b>A</b> | A(0.553)G(0.447) | A(0.429)G(0.571) | <b>G(1)</b>      | A(0.028)G(0.972) | <b>G(1)</b>      | A(0.080)G(0.920) |
| 14.54275662 | rs13092634 | 3  | 192334655<br>[190851961] | -               | -        | -                                                                                                 | <b>A</b> | A(0.395)G(0.605) | A(0.607)G(0.393) | A(0.967)G(0.033) | A(0.956)G(0.044) | <b>A(1)</b>      | A(0.951)G(0.049) |
| 14.36201865 | rs10789536 | 11 | 106072227<br>[106567017] | <i>GUCY1A2</i>  | Intronic | <i>Chemical dependency (tobacco use)</i>                                                          | <b>A</b> | A(0.263)G(0.737) | A(0.536)G(0.464) | A(0.800)G(0.200) | A(0.911)G(0.089) | A(0.341)G(0.659) | A(0.363)G(0.637) |
| 14.24534597 | rs12666164 | 7  | 37932726<br>[37966201]   | <i>EPDR1</i>    | Intronic | <i>Chemical dependency (tobacco use); Cancer (Prostate cancer)</i>                                | <b>T</b> | T(0.605)C(0.395) | T(0.857)C(0.143) | T(0.900)C(0.100) | T(0.989)C(0.011) | T(0.852)C(0.148) | T(0.680)C(0.320) |
| 14.17566315 | rs7867486  | 9  | 99350355<br>[100310534]  | <i>TMOD1</i>    | Intronic | None                                                                                              | <b>G</b> | G(0.553)A(0.447) | G(0.714)A(0.286) | G(0.933)A(0.067) | <b>G(1)</b>      | G(0.784)A(0.216) | G(0.783)A(0.217) |
| 14.07888701 | rs2497401  | 13 | 84749880<br>[85851879]   | -               | -        | -                                                                                                 | <b>T</b> | T(0.737)C(0.263) | T(0.321)C(0.679) | T(0.167)C(0.833) | T(0.083)C(0.917) | T(0.045)C(0.955) | T(0.100)C(0.900) |

<sup>1</sup> Position as defined by the HapMap Project (<http://hapmap.ncbi.nlm.nih.gov/>) and the Illumina array content (<http://www.illumina.com/science/controldb.ilmn>). The position in brackets as defined by Genome Build 37.3 used by NCBI dbSNP (<http://www.ncbi.nlm.nih.gov/projects/SNP/>) and the UCSC Genome Browser (<http://genome.ucsc.edu/>).

<sup>2</sup> Previous gene-based association as defined by the Genetic Association Database (<http://geneticassociationdb.nih.gov/>)

<sup>3</sup> The U1 gene is a uridine-rich small nuclear ribonucleoprotein (snRNP), which carries out many essential functions via interactions of their RNA and protein components with the pre-mRNA, specifically, they mediate the recognition and subsequent pairing of the 5' and 3' splice sites of an intron [58].
