# Supplementary material for: Complex Patterns of Genomic Admixture within Southern Africa
Source: PubMed Central journal article supplement (PMC3597481; doi:10.1371/journal.pgen.1003309), 2013-03-14
Supplement: pgen.1003309.s016.pdf [file pgen.1003309.s016.pdf]

Petersen DC, et al. **Complex Patterns of Genomic Admixture within Southern Africa**

**Table S6.** Of the 2687 Ju/'hoan versus Yoruba AIMS ( $-\log_{10}P > 5$ ) 33 are nonsynonymous variants and are ordered in descending order from most significant.

| <b>-log<sub>10</sub> P</b> | <b>SNP (rs#)</b> | <b>Chr</b> | <b>Position<sup>1</sup></b> | <b>Gene</b>     | <b>Gene product (GO)<sup>2</sup></b>                                                                                                                          | <b>Base change</b> | <b>AA change</b> | <b>SIFT prediction (score)<sup>3</sup></b> | <b>Genetic Association Class (Phenotype)<sup>4</sup></b>                                                                                                            | <b>Pan<sup>5</sup></b> | <b>Ju/'hoan (n=19)</b> | <b>Yoruba<sup>6</sup> (n=90)</b> |
|----------------------------|------------------|------------|-----------------------------|-----------------|---------------------------------------------------------------------------------------------------------------------------------------------------------------|--------------------|------------------|--------------------------------------------|---------------------------------------------------------------------------------------------------------------------------------------------------------------------|------------------------|------------------------|----------------------------------|
| 12.07595565                | rs2272662        | 8          | 145610534<br>[145639726]    | <i>SLC39A4</i>  | Zinc transporter (BP: cellular zinc iron homeostasis / transmembrane transport)                                                                               | A>G                | T332A            | Tolerated (0.15)                           | <i>Reproduction (spontaneous abortion)</i>                                                                                                                          | A                      | A(0.5363)<br>G(0.4737) | A(0.9889)<br>G(0.0111)           |
| 11.29070609                | rs28434777       | 7          | 150122089<br>[150491156]    | <i>TMEM176B</i> | Transmembrane protein (BP: cell differentiation / organ morphogenesis)                                                                                        | T>C                | T70A             | Tolerated (0.14)                           | none                                                                                                                                                                | T                      | T(0.5)<br>C(0.5)       | T(0.95)<br>C(0.05)               |
| 10.81051294                | rs479661         | 2          | 169429623<br>[169721377]    | <i>NOSTRIN</i>  | Nitric oxide (NO) synthase trafficker (BP: negative regulation of transcription / endocytosis / NO metabolic process)                                         | T>C                | G473E            | Tolerated (0.77)                           | <i>Chemical dependency (tobacco use)</i><br><i>Psychology (autism)</i>                                                                                              | T                      | T(0.7368)<br>C(0.2632) | T(0.9944)<br>C(0.0056)           |
| 10.31647493                | rs3911730        | 18         | 66022323<br>[67871343]      | <i>RTTN</i>     | Rotatin (BP: determination of left/right symmetry)                                                                                                            | A>C                | S126A            | Tolerated (0.85)                           | none                                                                                                                                                                | A                      | A(0.4474)<br>C(0.5526) | A(0.9333)<br>C(0.0667)           |
| 8.941965582                | rs3809045        | 11         | 118549542<br>[119044332]    | <i>NLRX1</i>    | Nod-like receptor (BP: innate immune response)                                                                                                                | G>T                | R125L            | Tolerated (0.07)                           | none                                                                                                                                                                | G                      | G(0.7632)<br>T(0.2368) | G(1)                             |
| 8.807859407                | rs857725         | 1          | 156874559<br>[158607935]    | <i>SPTA1</i>    | Erythrocyte spectrin alpha chain (BP: actin filament organization)                                                                                            | T>G                | K1693Q           | Tolerated (0.59)                           | <i>Hematological (erythrocyte phenotype)</i><br><i>Chemical dependency (tobacco use)</i><br><i>Cardiovascular (hypertension)</i>                                    | T                      | T(0.4737)<br>G(0.5263) | T(0.9222)<br>G(0.0778)           |
| 8.506041418                | rs36074897       | 19         | 17332346<br>[17471346]      | <i>PLVAP</i>    | Plasmalemma vesicle-associated protein (MF: protein homodimerization activity)                                                                                | G>A                | A438V            | Tolerated (0.41)                           | none                                                                                                                                                                | G                      | G(0.8158)<br>A(0.1842) | G(1)                             |
| 8.506041418                | rs5030980        | 16         | 66074446<br>[67516945]      | <i>AGRP</i>     | Agouti-related protein (BP: feeding behavior / hormone-mediated signaling pathway)                                                                            | G>A                | A67T             | Tolerated (0.95)                           | <i>Metabolic (body mass)</i><br><i>Psychology (anorexia nervosa)</i>                                                                                                | G                      | G(0.8158)<br>A(0.1842) | G(1)                             |
| 8.502829686                | rs28689661       | 16         | 79793826<br>[81236325]      | <i>PKD1L2</i>   | Polycystic kidney disease protein (BP: neuropeptide signaling pathway)                                                                                        | A>C                | V308G            | Damaging (0)                               | <i>Chemical dependency (smoking cessation)</i><br><i>Psychological (conduct disorder or ADHD)</i><br><i>Metabolic (high-density lipoprotein cholesterol)</i>        | A                      | A(0.5789)<br>C(0.4211) | A(0.9444)<br>C(0.0556)           |
| 7.971233109                | rs11592585       | 10         | 133805417<br>[133955427]    | <i>JAKMIP3</i>  | Janus kinase and microtubule-interacting protein (MF: kinase binding / microtubule binding)                                                                   | A>G                | M493V            | Tolerated (0.31)                           | none                                                                                                                                                                | A                      | A(0.7632)<br>G(0.2368) | A(0.9944)<br>G(0.0056)           |
| 7.941568766                | rs5036           | 17         | 39694471<br>[42338945]      | <i>SLC4A1</i>   | Anion transport protein (BP: ion transport or homeostasis)                                                                                                    | A>G                | K56E             | Tolerated (1.0)                            | <i>Cardiovascular (blood pressure)</i><br><i>Renal</i><br><i>Hematological (malarial anemia, spherocytosis, priapism)</i><br><i>Metabolic (Hyperparathyroidism)</i> | ND                     | A(0.5263)<br>G(0.4737) | A(0.9222)<br>G(0.0778)           |
| 7.535865391                | rs11575216       | 12         | 55041724<br>[56755457]      | <i>APOF</i>     | Apolipoprotein (BP: lipid metabolic process / lipid transport)                                                                                                | C>G                | A178G            | Tolerated (0.39)                           | <i>Infection (Hepatitis C remission)</i><br><i>Neurological (Alzheimer's)</i><br><i>Cardiovascular (coronary artery disease)</i>                                    | G                      | C(0.7632)<br>G(0.2368) | C(0.9833)<br>G(0.0167)           |
| 7.407783096                | rs34156839       | 19         | 11346552<br>[11485552]      | <i>SWSAP1</i>   | ATPase SWIM-type zinc finger associated protein (BP: ATP catabolic process / double-strand break repair via homologous recombination / protein stabilization) | C>T                | L45F             | Tolerated (0.18)                           | none                                                                                                                                                                | C                      | C(0.6316)<br>T(0.3684) | C(0.9556)<br>T(0.0444)           |
| 7.319832012                | rs12440118       | 15         | 40531386<br>[42744094]      | <i>ZFP106</i>   | Zinc finger protein (BP: insulin receptor signaling pathway)                                                                                                  | A>G                | W103R            | Tolerated (0.92)                           | <i>Chemical dependency (Tobacco use)</i>                                                                                                                            | ND                     | A(0.8421)<br>G(0.1579) | A(1)                             |
| 7.258842632                | rs1893963        | 18         | 26903040<br>[28649042]      | <i>DSC2</i>     | Desmocollin (BP: homophilic cell adhesion)                                                                                                                    | A>G                | I776V            | Tolerated (1.0)                            | <i>Cardiovascular (arrhythmia, cardiomyopathy)</i>                                                                                                                  | G                      | A(0.0789)<br>G(0.9211) | A(0.5944)<br>G(0.4056)           |

|             |            |    |                          |                                    |                                                                                                                                                          |     |                     |                  |                                                                                                                                                          |   |                        |                        |
|-------------|------------|----|--------------------------|------------------------------------|----------------------------------------------------------------------------------------------------------------------------------------------------------|-----|---------------------|------------------|----------------------------------------------------------------------------------------------------------------------------------------------------------|---|------------------------|------------------------|
| 6.805988329 | rs9932495  | 16 | 23629366<br>[23721865]   | <i>ERN2</i>                        | Endoplasmic reticulum to nucleus-signaling (BP: mRNA processing)                                                                                         | C>T | V117I               | Tolerated (0.46) | <i>Chemical dependency (Tobacco use)</i>                                                                                                                 | C | C(0.6316)<br>T(0.3684) | C(0.9389)<br>T(0.0611) |
| 6.460162224 | rs17690300 | 2  | 75746619<br>[75893111]   | <i>GCFC2</i><br>( <i>MRPL19</i> )* | GC-rich sequence DNA-binding factor (BP: regulation of transcription)                                                                                    | T>G | E724D<br>(intronic) | Not scored       | none<br><br><i>[Chemical dependency (tobacco use)]</i>                                                                                                   | T | T(0.8611)<br>G(0.1389) | T(1)                   |
| 6.447033053 | rs12863734 | 13 | 85268572<br>[86370571]   | <i>SLITRK6</i>                     | SLIT and NTRK-like protein or Leucine-rich repeat-containing protein (BP: axonogenesis)                                                                  | G>A | L25F                | Tolerated (0.09) | none                                                                                                                                                     | A | G(0.7632)<br>A(0.2368) | G(0.9833)<br>A(0.0167) |
| 6.411250347 | rs35928055 | 7  | 23704416<br>[23737891]   | <i>C7orf46</i>                     | Uncharacterized protein                                                                                                                                  | A>G | S240G               | Tolerated (0.35) | none                                                                                                                                                     | A | A(0.7895)<br>G(0.2105) | A(0.9833)<br>G(0.0167) |
| 6.210532664 | rs690514   | 17 | 70374188<br>[72862593]   | <i>FDXR</i>                        | Mitochondrial adrenodoxin oxidoreductase like (BP: NADPH oxidation)                                                                                      | G>A | R123Q               | Tolerated (0.31) | none                                                                                                                                                     | G | G(0.7632)<br>A(0.2368) | G(0.9889)<br>A(0.0111) |
| 6.155237791 | rs12305038 | 12 | 20413519<br>[2052252]    | <i>PDE3A</i>                       | cGMP-inhibited 3',5'-cyclic phosphodiesterase (multiple processes)                                                                                       | G>A | D12N                | Tolerated (0.23) | <i>Reproduction (male infertility)</i><br><i>Developmental (height)</i><br><i>Cardiovascular (QT interval, aortic root size, cardiovascular disease)</i> | G | G(0.8421)<br>A(0.1579) | G(0.3889)<br>A(0.6111) |
| 6.150397387 | rs2231524  | 8  | 141594509<br>[141525327] | <i>CHRAC1</i>                      | Chromatin assembly complex protein (BP: chromatin remodeling / DNA replication / histone acetylation)                                                    | A>G | H126R               | Tolerated (0.75) | none                                                                                                                                                     | A | A(0.8684)<br>G(0.1316) | A(1)                   |
| 6.150397387 | rs12671170 | 7  | 20160504<br>[20193979]   | <i>MACC1</i>                       | Metastasis-associated in colon cancer protein (BP: regulation of transcription / positive regulation of cell division)                                   | T>G | E728A               | Tolerated (0.06) | none                                                                                                                                                     | G | T(0.8684)<br>G(0.1316) | T(1)                   |
| 6.150397387 | rs34255002 | 1  | 21104047<br>[21231460]   | <i>EIF4G3</i>                      | Eukaryotic translation initiation factor (BP: RNA metabolic process / cytokine-mediated signaling pathway / regulation of translation / spermatogenesis) | T>G | Q500H               | Damaging (0.03)  | <i>Chemical dependency (Tobacco use)</i>                                                                                                                 | T | T(0.8684)<br>G(0.1316) | T(1)                   |
| 5.664800375 | rs35371972 | 17 | 36830744<br>[39577218]   | <i>KRT37</i>                       | Keratin protein (MF: Structural molecule activity)                                                                                                       | G>A | S421F               | Damaging (0)     | none                                                                                                                                                     | G | G(0.7222)<br>A(0.2778) | G(0.9611)<br>A(0.0389) |
| 5.544786783 | rs2748421  | 8  | 142586404<br>[142517222] | <i>FLJ43860</i>                    | Uncharacterized protein                                                                                                                                  | T>C | Y10H                | Tolerated (1.0)  | none                                                                                                                                                     | C | T(0.4737)<br>C(0.5263) | T(0.8611)<br>T(0.1389) |
| 5.469163162 | rs3744550  | 17 | 10147320<br>[10206595]   | <i>MYH13</i>                       | Myosin (BP: cellular response to starvation / muscle contraction)                                                                                        | T>C | H1862R              | Tolerated (1.0)  | <i>Chemical dependency (Tobacco use)</i><br><i>Neurological (Alzheimer's)</i>                                                                            | C | T(0.5263)<br>C(0.4737) | T(0.8722)<br>C(0.1278) |
| 5.331572094 | rs2306513  | 17 | 30484629<br>[33460516]   | <i>NLE1</i>                        | Notchless Drosophila homolog (BP: Notch signaling / inner cell mass cell differentiation)                                                                | A>G | Y114H               | Tolerated (0.08) | none                                                                                                                                                     | A | A(0.8333)<br>G(0.1667) | A(0.9889)<br>G(0.0111) |
| 5.325684488 | rs17513722 | 2  | 61920937<br>[62067433]   | <i>FAM161A</i>                     | Protein FAM (BP: response to stimulus / visual perception)                                                                                               | T>C | I236V               | Tolerated (0.5)  | none                                                                                                                                                     | T | T(0.8158)<br>C(0.1842) | T(0.9833)<br>C(0.0167) |
| 5.226628042 | rs2291157  | 4  | 5771922<br>[5721021]     | <i>EVC</i>                         | Ellis-van Creveld syndrome protein (BP: Skeletal system development)                                                                                     | T>G | Q74P                | Tolerated (0.12) | <i>Chemical dependency (Tobacco use)</i><br><i>Psychology (suicide)</i><br><i>Developmental (cleft palate)</i>                                           | T | T(0.6842)<br>G(0.3158) | T(0.9556)<br>G(0.0444) |
| 5.208574822 | rs17121403 | 1  | 100108565<br>[100335977] | <i>AGL</i>                         | Glycogen debranching enzyme (BP: glycogen biosynthesis)                                                                                                  | A>G | Q229R               | Tolerated (0.66) | <i>Chemical dependency (Tobacco use)</i><br><i>Metabolic (glycogen storage disease)</i>                                                                  | A | A(0.4737)<br>G(0.5263) | A(0.8427)<br>G(0.1573) |
| 5.058425123 | rs16902381 | 5  | 35694996<br>[35659239]   | <i>SPEF2</i>                       | Sperm flagellar (BP: nucleobase-containing metabolic process)                                                                                            | G>A | R366K               | Tolerated (0.07) | <i>Chemical dependency (Tobacco use)</i>                                                                                                                 | G | G(0.7895)<br>A(0.2105) | G(0.9722)<br>A(0.0278) |
| 5.042427081 | rs2289080  | 2  | 233114422<br>[233406178] | <i>CHRNA3</i>                      | Acetylcholine receptor subunit gamma (BP: muscle contraction / signal transduction / synaptic transmission / transport)                                  | G>A | A149T               | Tolerated (0.19) | <i>Chemical dependency (Tobacco use)</i><br><i>Cardiovascular (cardiovascular disease)</i><br><i>Psychological (multiple disorders)</i>                  | G | G(0.8421)<br>A(0.1579) | G(0.9889)<br>A(0.0111) |

<sup>1</sup>Chromosome location as per Illumina array Reference Assembly Build 36.3 or in brackets Assembly GRCh37.p5 Build 37.3; <sup>2</sup>GO, gene ontology (<http://amigo.geneontology.org/>); BP=Biological process or MF=molecular function; <sup>3</sup>SIFT prediction (<http://sift.jcvi.org/>); <sup>4</sup>Positive or suggested gene-phenotype classification as per the Genetic Association Database (<http://geneticassociationdb.nih.gov/>), no associations were SNP specific; <sup>5</sup>Chimpanzee (*Pan troglodytes*) allele, derived from the genome sequence (version PanTro2; <http://genome.ucsc.edu/>); <sup>6</sup>Data derived from the Illumina iControl Database ([www.illumina.com/](http://www.illumina.com/)); \* Overlap between genes although intronic in *MRPL19*. This gene was included as it has been previously associated with tobacco use. ND (not determined)
