# Supplementary material for: Complex Patterns of Genomic Admixture within Southern Africa
Source: PubMed Central journal article supplement (PMC3597481; doi:10.1371/journal.pgen.1003309), 2013-03-14
Supplement: pgen.1003309.s017.pdf [file pgen.1003309.s017.pdf]

Petersen DC, et al. **Complex Patterns of Genomic Admixture within Southern Africa**

**Table S7.** Ju/'hoan versus Yoruba differentiating AIMs located within genes ranked according to significance of genes enriched for biological processes.

| #  | Biological Processes                                  | pValue    | Ratio | Ratio |
|----|-------------------------------------------------------|-----------|-------|-------|
| 1  | nervous system development                            | 1.021E-31 | 233   | 2226  |
| 2  | synaptic transmission                                 | 2.141E-26 | 111   | 756   |
| 3  | transmission of nerve impulse                         | 2.933E-25 | 117   | 851   |
| 4  | multicellular organismal signaling                    | 2.933E-25 | 117   | 851   |
| 5  | generation of neurons                                 | 6.267E-25 | 160   | 1414  |
| 6  | neurogenesis                                          | 7.589E-25 | 166   | 1499  |
| 7  | multicellular organismal development                  | 8.846E-25 | 372   | 4791  |
| 8  | system development                                    | 1.285E-24 | 331   | 4089  |
| 9  | cell development                                      | 1.842E-24 | 169   | 1553  |
| 10 | neuron development                                    | 7.110E-24 | 120   | 920   |
| 11 | neuron differentiation                                | 8.468E-24 | 133   | 1087  |
| 12 | anatomical structure development                      | 1.047E-23 | 353   | 4519  |
| 13 | cell differentiation                                  | 3.586E-23 | 264   | 3047  |
| 14 | developmental process                                 | 4.101E-23 | 391   | 5228  |
| 15 | cell-cell signaling                                   | 5.658E-23 | 136   | 1149  |
| 16 | cellular developmental process                        | 8.439E-23 | 268   | 3130  |
| 17 | multicellular organismal process                      | 1.398E-22 | 486   | 7028  |
| 18 | cell projection organization                          | 1.943E-22 | 120   | 956   |
| 19 | regulation of system process                          | 2.310E-20 | 92    | 661   |
| 20 | behavior                                              | 1.099E-19 | 86    | 605   |
| 21 | regulation of synaptic transmission                   | 1.936E-19 | 58    | 307   |
| 22 | regulation of transmission of nerve impulse           | 5.159E-19 | 60    | 333   |
| 23 | central nervous system development                    | 1.128E-18 | 110   | 929   |
| 24 | anatomical structure morphogenesis                    | 1.593E-18 | 199   | 2230  |
| 25 | regulation of localization                            | 1.640E-18 | 163   | 1680  |
| 26 | ion transport                                         | 4.175E-18 | 120   | 1080  |
| 27 | ion transmembrane transport                           | 4.648E-18 | 79    | 558   |
| 28 | neuron projection development                         | 9.646E-18 | 95    | 761   |
| 29 | regulation of neurological system process             | 1.664E-17 | 60    | 357   |
| 30 | signaling                                             | 2.400E-17 | 386   | 5525  |
| 31 | regulation of signaling                               | 4.302E-17 | 196   | 2251  |
| 32 | calcium ion transport                                 | 5.509E-17 | 46    | 226   |
| 33 | regulation of membrane potential                      | 6.930E-17 | 52    | 285   |
| 34 | neuron projection morphogenesis                       | 6.941E-17 | 86    | 670   |
| 35 | cell projection morphogenesis                         | 7.827E-17 | 92    | 747   |
| 36 | cell communication                                    | 1.179E-16 | 393   | 5707  |
| 37 | cell part morphogenesis                               | 2.769E-16 | 92    | 762   |
| 38 | locomotory behavior                                   | 3.236E-16 | 42    | 199   |
| 39 | regulation of developmental process                   | 3.345E-16 | 156   | 1671  |
| 40 | regulation of multicellular organismal process        | 4.204E-16 | 187   | 2157  |
| 41 | regulation of biological quality                      | 4.729E-16 | 230   | 2860  |
| 42 | regulation of ion transport                           | 4.913E-16 | 62    | 405   |
| 43 | cell morphogenesis involved in neuron differentiation | 5.794E-16 | 83    | 656   |
| 44 | divalent metal ion transport                          | 1.995E-15 | 48    | 267   |
| 45 | regulation of nucleotide metabolic process            | 2.127E-15 | 78    | 608   |
| 46 | divalent inorganic cation transport                   | 3.634E-15 | 48    | 271   |
| 47 | regulation of transport                               | 4.193E-15 | 129   | 1314  |
| 48 | axon guidance                                         | 6.997E-15 | 65    | 463   |
| 49 | axonogenesis                                          | 8.879E-15 | 78    | 624   |
| 50 | cognition                                             | 8.998E-15 | 47    | 267   |

Green number, number of genes that contain Ju/'hoan or Yoruba AIMs  
 Red number, total number of genes in the biological process gene ontology identifier
