# Supplementary material for: Complex Patterns of Genomic Admixture within Southern Africa
Source: PubMed Central journal article supplement (PMC3597481; doi:10.1371/journal.pgen.1003309), 2013-03-14
Supplement: pgen.1003309.s018.pdf [file pgen.1003309.s018.pdf]

Petersen DC, et al. **Complex Patterns of Genomic Admixture within Southern Africa**

**Table S8.** Ju/'hoan versus Yoruba differentiating AIMs located within genes ranked according to significance of genes enriched for molecular functions.

| #  | Molecular Functions                                          | pValue    | Ratio     |
|----|--------------------------------------------------------------|-----------|-----------|
| 1  | binding                                                      | 1.972E-14 | 693 13874 |
| 2  | ion transmembrane transporter activity                       | 2.116E-14 | 83 796    |
| 3  | protein binding                                              | 6.622E-13 | 481 8906  |
| 4  | acetylcholine receptor binding                               | 8.071E-13 | 11 15     |
| 5  | substrate-specific transmembrane transporter activity        | 2.182E-12 | 87 930    |
| 6  | calcium ion binding                                          | 3.266E-12 | 75 750    |
| 7  | transmembrane transporter activity                           | 1.019E-11 | 91 1022   |
| 8  | ion binding                                                  | 2.134E-11 | 271 4462  |
| 9  | metal ion binding                                            | 2.143E-11 | 268 4400  |
| 10 | cation binding                                               | 2.586E-11 | 270 4449  |
| 11 | ion channel activity                                         | 3.079E-11 | 50 418    |
| 12 | gated channel activity                                       | 4.866E-11 | 43 330    |
| 13 | substrate-specific channel activity                          | 6.649E-11 | 50 427    |
| 14 | substrate-specific transporter activity                      | 9.385E-11 | 92 1082   |
| 15 | channel activity                                             | 1.514E-10 | 51 451    |
| 16 | passive transmembrane transporter activity                   | 1.639E-10 | 51 452    |
| 17 | cation channel activity                                      | 7.444E-10 | 38 293    |
| 18 | PTB domain binding                                           | 1.405E-09 | 8 11      |
| 19 | cation transmembrane transporter activity                    | 5.179E-09 | 58 606    |
| 20 | transporter activity                                         | 7.150E-09 | 100 1320  |
| 21 | nucleoside-triphosphatase regulator activity                 | 8.672E-09 | 49 477    |
| 22 | GTPase regulator activity                                    | 9.193E-09 | 48 463    |
| 23 | enzyme activator activity                                    | 1.385E-08 | 48 469    |
| 24 | channel regulator activity                                   | 1.485E-08 | 18 86     |
| 25 | voltage-gated channel activity                               | 5.692E-08 | 28 208    |
| 26 | voltage-gated ion channel activity                           | 5.692E-08 | 28 208    |
| 27 | guanyl-nucleotide exchange factor activity                   | 2.173E-07 | 25 183    |
| 28 | calcium channel regulator activity                           | 2.308E-07 | 10 30     |
| 29 | small GTPase regulator activity                              | 3.416E-07 | 33 295    |
| 30 | actin binding                                                | 7.953E-07 | 37 365    |
| 31 | adenyl ribonucleotide binding                                | 1.429E-06 | 108 1627  |
| 32 | adenyl nucleotide binding                                    | 2.064E-06 | 108 1640  |
| 33 | peptidase activator activity                                 | 2.987E-06 | 11 47     |
| 34 | ATP binding                                                  | 3.293E-06 | 105 1599  |
| 35 | active transmembrane transporter activity                    | 4.305E-06 | 37 392    |
| 36 | calmodulin binding                                           | 5.141E-06 | 21 163    |
| 37 | enzyme regulator activity                                    | 6.651E-06 | 78 1112   |
| 38 | voltage-gated cation channel activity                        | 1.118E-05 | 20 158    |
| 39 | cytoskeletal protein binding                                 | 1.795E-05 | 50 636    |
| 40 | polysaccharide binding                                       | 2.173E-05 | 24 221    |
| 41 | pattern binding                                              | 2.173E-05 | 24 221    |
| 42 | calcium channel activity                                     | 2.272E-05 | 14 90     |
| 43 | voltage-gated calcium channel activity                       | 2.440E-05 | 8 30      |
| 44 | purine ribonucleotide binding                                | 2.827E-05 | 121 2001  |
| 45 | ribonucleotide binding                                       | 2.891E-05 | 121 2002  |
| 46 | Rho guanyl-nucleotide exchange factor activity               | 3.148E-05 | 13 81     |
| 47 | Ras guanyl-nucleotide exchange factor activity               | 3.710E-05 | 15 106    |
| 48 | purine nucleotide binding                                    | 4.017E-05 | 121 2017  |
| 49 | glycosaminoglycan binding                                    | 4.512E-05 | 22 202    |
| 50 | transmembrane receptor protein tyrosine phosphatase activity | 4.529E-05 | 6 17      |

Green number, number of genes that contain Ju/'hoan or Yoruba AIMs  
 Red number, total number of genes in the molecular functions gene ontology identifier
