# Supplementary material for: Complex Patterns of Genomic Admixture within Southern Africa
Source: PubMed Central journal article supplement (PMC3597481; doi:10.1371/journal.pgen.1003309), 2013-03-14
Supplement: pgen.1003309.s019.pdf [file pgen.1003309.s019.pdf]

Petersen DC, et al. **Complex Patterns of Genomic Admixture within Southern Africa**

**Table S9.** Ju/'hoan versus Yoruba differentiating AIMS located within genes ranked according to significance of genes enriched for cellular localization.

| #  | Cellular Localizations                | pValue    | Ratio | Ratio |
|----|---------------------------------------|-----------|-------|-------|
| 1  | cell periphery                        | 2.646E-19 | 356   | 4856  |
| 2  | plasma membrane                       | 3.437E-18 | 347   | 4767  |
| 3  | synapse                               | 4.483E-16 | 74    | 542   |
| 4  | plasma membrane part                  | 1.220E-14 | 194   | 2346  |
| 5  | synapse part                          | 1.666E-12 | 56    | 409   |
| 6  | intrinsic to plasma membrane          | 3.228E-12 | 130   | 1453  |
| 7  | membrane                              | 5.901E-12 | 539   | 9022  |
| 8  | cell projection                       | 2.881E-11 | 119   | 1329  |
| 9  | integral to plasma membrane           | 3.687E-11 | 123   | 1396  |
| 10 | neuron projection                     | 1.141E-09 | 75    | 744   |
| 11 | cell junction                         | 1.323E-09 | 73    | 718   |
| 12 | dendrite                              | 2.251E-09 | 50    | 414   |
| 13 | synaptic membrane                     | 4.635E-09 | 33    | 217   |
| 14 | ion channel complex                   | 1.164E-08 | 33    | 225   |
| 15 | proteinaceous extracellular matrix    | 2.407E-08 | 47    | 405   |
| 16 | postsynaptic density                  | 7.925E-08 | 23    | 132   |
| 17 | dendritic spine head                  | 7.925E-08 | 23    | 132   |
| 18 | presynaptic membrane                  | 2.203E-07 | 15    | 63    |
| 19 | basement membrane                     | 2.609E-07 | 19    | 100   |
| 20 | neuron spine                          | 3.031E-07 | 27    | 186   |
| 21 | dendritic spine                       | 3.031E-07 | 27    | 186   |
| 22 | neuronal cell body                    | 3.208E-07 | 43    | 387   |
| 23 | cell projection part                  | 3.224E-07 | 65    | 700   |
| 24 | extracellular matrix                  | 3.884E-07 | 49    | 472   |
| 25 | cell body                             | 5.389E-07 | 44    | 408   |
| 26 | cell leading edge                     | 8.410E-07 | 33    | 269   |
| 27 | membrane part                         | 1.872E-06 | 418   | 7239  |
| 28 | membrane fraction                     | 2.408E-06 | 95    | 1221  |
| 29 | cation channel complex                | 2.485E-06 | 22    | 148   |
| 30 | insoluble fraction                    | 2.617E-06 | 98    | 1273  |
| 31 | extracellular matrix part             | 7.809E-06 | 26    | 207   |
| 32 | postsynaptic membrane                 | 9.073E-06 | 24    | 184   |
| 33 | intrinsic to membrane                 | 9.192E-06 | 366   | 6306  |
| 34 | calcium channel complex               | 1.393E-05 | 9     | 32    |
| 35 | dendritic shaft                       | 3.596E-05 | 10    | 44    |
| 36 | membrane raft                         | 4.013E-05 | 25    | 214   |
| 37 | axon                                  | 5.620E-05 | 33    | 328   |
| 38 | basolateral plasma membrane           | 6.019E-05 | 32    | 315   |
| 39 | integral to membrane                  | 8.547E-05 | 351   | 6160  |
| 40 | apical part of cell                   | 9.689E-05 | 32    | 323   |
| 41 | voltage-gated calcium channel complex | 9.954E-05 | 7     | 24    |
| 42 | cytoskeleton                          | 1.030E-04 | 123   | 1836  |
| 43 | synaptosome                           | 1.343E-04 | 19    | 152   |
| 44 | apical plasma membrane                | 1.733E-04 | 26    | 248   |
| 45 | adherens junction                     | 2.358E-04 | 22    | 198   |
| 46 | anchoring junction                    | 3.427E-04 | 23    | 217   |
| 47 | ruffle                                | 1.191E-03 | 15    | 127   |
| 48 | cell fraction                         | 1.203E-03 | 108   | 1680  |
| 49 | cell cortex                           | 1.562E-03 | 20    | 199   |
| 50 | Golgi apparatus                       | 2.095E-03 | 77    | 1149  |

Green number, number of genes that contain Ju/'hoan or Yoruba AIMS  
 Red number, total number of genes in the cellular localization gene ontology identifier
