# Supplementary material for: Complex Patterns of Genomic Admixture within Southern Africa
Source: PubMed Central journal article supplement (PMC3597481; doi:10.1371/journal.pgen.1003309), 2013-03-14
Supplement: pgen.1003309.s020.pdf [file pgen.1003309.s020.pdf]

Petersen DC, et al. **Complex Patterns of Genomic Admixture within Southern Africa**

**Table S10.** Ju/'hoan versus Yoruba differentiating AIMs located within genes ranked according to significance of genes enriched for disease associations.

| #  | Diseases                                            | pValue    | Ratio | Ratio |
|----|-----------------------------------------------------|-----------|-------|-------|
| 1  | Multiple Sclerosis                                  | 2.079E-39 | 286   | 2205  |
| 2  | Demyelinating Diseases                              | 2.354E-39 | 292   | 2279  |
| 3  | Demyelinating Autoimmune Diseases, CNS              | 2.973E-39 | 286   | 2209  |
| 4  | Autoimmune Diseases of the Nervous System           | 3.195E-38 | 287   | 2248  |
| 5  | Autoimmune Diseases                                 | 1.151E-30 | 337   | 3121  |
| 6  | Nervous System Diseases                             | 8.846E-26 | 440   | 4799  |
| 7  | Immune System Diseases                              | 8.443E-22 | 432   | 4867  |
| 8  | Depressive Disorder                                 | 1.648E-18 | 127   | 918   |
| 9  | Mood Disorders                                      | 1.816E-18 | 146   | 1131  |
| 10 | Psychiatry and Psychology                           | 2.681E-18 | 279   | 2820  |
| 11 | Depressive Disorder, Major                          | 2.826E-18 | 126   | 913   |
| 12 | Mental Disorders                                    | 3.905E-18 | 277   | 2800  |
| 13 | Tobacco Use Disorder                                | 6.226E-18 | 65    | 319   |
| 14 | Respiratory Hypersensitivity                        | 4.198E-14 | 134   | 1125  |
| 15 | Asthma                                              | 1.417E-13 | 132   | 1119  |
| 16 | Bronchial Diseases                                  | 4.978E-13 | 135   | 1174  |
| 17 | Lung Diseases, Obstructive                          | 1.520E-12 | 137   | 1216  |
| 18 | Bipolar Disorder                                    | 1.081E-11 | 90    | 693   |
| 19 | Affective Disorders, Psychotic                      | 1.268E-11 | 90    | 695   |
| 20 | Hypersensitivity                                    | 1.491E-11 | 151   | 1430  |
| 21 | Hypersensitivity, Immediate                         | 1.853E-11 | 137   | 1258  |
| 22 | Amyloid Neuropathies, Familial                      | 6.477E-10 | 9     | 11    |
| 23 | Lewy Body Disease                                   | 1.820E-09 | 18    | 54    |
| 24 | Amyloid Neuropathies                                | 2.447E-09 | 9     | 12    |
| 25 | Schizophrenia                                       | 3.001E-09 | 107   | 976   |
| 26 | Schizophrenia and Disorders with Psychotic Features | 3.769E-09 | 107   | 980   |
| 27 | Cerebral Amyloid Angiopathy                         | 1.197E-08 | 14    | 36    |
| 28 | Epilepsy                                            | 2.658E-08 | 51    | 361   |
| 29 | Mental Disorders Diagnosed in Childhood             | 4.242E-08 | 55    | 409   |
| 30 | Pancytopenia                                        | 5.643E-08 | 6     | 6     |
| 31 | Attention Deficit Disorder with Hyperactivity       | 1.047E-07 | 18    | 68    |
| 32 | Substance-Related Disorders                         | 1.165E-07 | 86    | 783   |
| 33 | Alzheimer disease, early onset                      | 2.160E-07 | 12    | 32    |
| 34 | Memory Disorders                                    | 6.101E-07 | 11    | 29    |
| 35 | Anxiety Disorders                                   | 9.144E-07 | 30    | 183   |
| 36 | Trisomy                                             | 1.113E-06 | 17    | 71    |
| 37 | Chromosome Duplication                              | 1.113E-06 | 17    | 71    |
| 38 | Autistic Disorder                                   | 1.127E-06 | 25    | 138   |
| 39 | Attention Deficit and Disruptive Behavior Disorders | 1.183E-06 | 18    | 79    |
| 40 | Child Development Disorders, Pervasive              | 1.295E-06 | 25    | 139   |
| 41 | Cerebral Arterial Diseases                          | 1.307E-06 | 14    | 50    |
| 42 | Gliosis                                             | 1.331E-06 | 11    | 31    |
| 43 | Monosomy                                            | 1.417E-06 | 6     | 8     |
| 44 | Seizures                                            | 2.429E-06 | 26    | 153   |
| 45 | Behavior and Behavior Mechanisms                    | 3.591E-06 | 50    | 411   |
| 46 | Neurologic Manifestations                           | 4.337E-06 | 118   | 1273  |
| 47 | Glucose Metabolism Disorders                        | 5.080E-06 | 162   | 1883  |
| 48 | Cocaine-Related Disorders                           | 1.083E-05 | 10    | 31    |
| 49 | Muscular Diseases                                   | 1.253E-05 | 55    | 489   |
| 50 | Aortic Aneurysm, Thoracic                           | 1.379E-05 | 8     | 20    |

Green number, number of genes that contain Ju/'hoan or Yoruba AIMs  
 Red number, total number of genes in the diseases gene ontology identifier
