# Supplementary material for: Complex Patterns of Genomic Admixture within Southern Africa
Source: PubMed Central journal article supplement (PMC3597481; doi:10.1371/journal.pgen.1003309), 2013-03-14
Supplement: pgen.1003309.s021.pdf [file pgen.1003309.s021.pdf]

Petersen DC, et al. **Complex Patterns of Genomic Admixture within Southern Africa**

**Table S11.** Allele sharing distances within (gray blocks) and between populations using identity-by-state (IBS) and including Fst distance values.

|                    | Ju/'hoan          | !Xun         | #Khomani     | Mbuti        | Biaka        | Xhosa        | Hadza        | Sandawe      | Baster       | Coloured     | Luhya        | Yoruba       | Maasai       | European     | Han Chinese  |
|--------------------|-------------------|--------------|--------------|--------------|--------------|--------------|--------------|--------------|--------------|--------------|--------------|--------------|--------------|--------------|--------------|
|                    | <i>Fst-values</i> |              |              |              |              |              |              |              |              |              |              |              |              |              |              |
| <b>Ju/'hoan</b>    | <b>0.224</b>      | 0.047        | 0.045        | 0.116        | 0.096        | 0.091        | 0.133        | 0.098        | 0.093        | 0.092        | 0.101        | 0.104        | 0.105        | 0.151        | 0.188        |
| <b>!Xun</b>        | 0.24              | <b>0.245</b> | 0.042        | 0.102        | 0.078        | 0.071        | 0.114        | 0.077        | 0.078        | 0.075        | 0.077        | 0.079        | 0.082        | 0.13         | 0.169        |
| <b>#Khomani</b>    | 0.249             | 0.256        | <b>0.254</b> | 0.273        | 0.275        | 0.275        | 0.283        | 0.283        | 0.28         | 0.282        | 0.309        | 0.285        | 0.287        | 0.304        | 0.311        |
| <b>Mbuti</b>       | 0.266             | 0.269        | 0.09         | <b>0.237</b> | 0.268        | 0.091        | 0.127        | 0.091        | 0.104        | 0.099        | 0.085        | 0.09         | 0.094        | 0.145        | 0.182        |
| <b>Biaka</b>       | 0.27              | 0.271        | 0.066        | 0.08         | <b>0.255</b> | 0.057        | 0.1          | 0.062        | 0.076        | 0.07         | 0.051        | 0.051        | 0.062        | 0.115        | 0.151        |
| <b>Xhosa</b>       | 0.274             | 0.272        | 0.056        | 0.278        | 0.274        | <b>0.268</b> | 0.284        | 0.281        | 0.062        | 0.054        | 0.033        | 0.032        | 0.282        | 0.1          | 0.138        |
| <b>Hadza</b>       | 0.281             | 0.281        | 0.099        | 0.284        | 0.283        | 0.089        | <b>0.247</b> | 0.075        | 0.093        | 0.087        | 0.076        | 0.082        | 0.075        | 0.123        | 0.162        |
| <b>Sandawe</b>     | 0.283             | 0.281        | 0.061        | 0.284        | 0.283        | 0.047        | 0.284        | <b>0.273</b> | 0.049        | 0.043        | 0.033        | 0.038        | 0.03         | 0.076        | 0.119        |
| <b>Baster</b>      | 0.283             | 0.285        | 0.05         | 0.294        | 0.292        | 0.29         | 0.296        | 0.29         | <b>0.277</b> | 0.02         | 0.312        | 0.296        | 0.29         | 0.283        | 2.297        |
| <b>Coloured</b>    | 0.285             | 0.286        | 0.05         | 0.293        | 0.291        | 0.288        | 0.295        | 0.289        | 0.281        | <b>0.283</b> | 0.313        | 0.293        | 0.29         | 0.286        | 0.296        |
| <b>Luhya</b>       | 0.285             | 0.282        | 0.062        | 0.282        | 0.278        | 0.274        | 0.284        | 0.28         | 0.056        | 0.047        | <b>0.272</b> | 0.019        | 0.28         | 0.085        | 0.124        |
| <b>Yoruba</b>      | 0.287             | 0.283        | 0.066        | 0.284        | 0.278        | 0.274        | 0.287        | 0.283        | 0.061        | 0.051        | 0.296        | <b>0.268</b> | 0.283        | 0.091        | 0.129        |
| <b>Maasai</b>      | 0.289             | 0.287        | 0.065        | 0.288        | 0.285        | 0.045        | 0.286        | 0.281        | 0.045        | 0.039        | 0.028        | 0.034        | <b>0.277</b> | 0.068        | 0.112        |
| <b>European</b>    | 0.311             | 0.309        | 0.104        | 0.313        | 0.31         | 0.307        | 0.308        | 0.301        | 0.034        | 0.037        | 0.322        | 0.309        | 0.299        | <b>0.267</b> | 0.299        |
| <b>Han Chinese</b> | 0.317             | 0.315        | 0.144        | 0.319        | 0.316        | 0.314        | 0.315        | 0.31         | 0.091        | 0.083        | 0.332        | 0.316        | 0.309        | 0.098        | <b>0.246</b> |
