# Supplementary material for: Complex Patterns of Genomic Admixture within Southern Africa
Source: PubMed Central journal article supplement (PMC3597481; doi:10.1371/journal.pgen.1003309), 2013-03-14
Supplement: pgen.1003309.s022.pdf [file pgen.1003309.s022.pdf]

**Table S12.** Contribution of four ancestral populations to the amaXhosa, Baster and Coloured populations displayed as a percentage for both the average and range distributions.

|                                           | <b>N*</b> | <b>African Khoesan</b> | <b>African Non-Khoesan</b> | <b>European</b>        | <b>Asian</b>           |
|-------------------------------------------|-----------|------------------------|----------------------------|------------------------|------------------------|
| <b>!Xun</b><br>Average<br>Range           | 13        | 77.1%<br>72% - 82.3%   | 20.5%<br>16.8% - 27%       | 0.9%<br>0% - 3.4%      | -                      |
| <b>!Xun NF2</b><br>Recent Bantu admixture | 1         | 52.2%                  | 47%                        | 0.1%                   | -                      |
| <b>#Khomani</b><br>Average<br>Range       | 31        | 70.6%<br>27.9% - 97.4% | 13.9%<br>2.2% - 55.8%      | 11%<br>0% - 41.3%      | 3.7%<br>0% - 19.1%     |
| <b>amaXhosa</b><br>Average<br>Range       | 15        | 35.4%<br>26.4% - 40.3% | 63.6%<br>58.5% - 69.3%     | 0.5%<br>0% -3.3%       | -                      |
| <b>Basters</b><br>Average<br>Range        | 30        | 28.5%<br>16.9% - 41.5% | 5.7%<br>0.2% - 13.1%       | 48.4%<br>37.4% - 60.6% | 17.1%<br>11.6 - 26.8%  |
| <b>NC Coloured</b><br>Average<br>Range    | 10        | 33%<br>20.6% - 55.8%   | 10.1%<br>3.5% - 19.7%      | 40%<br>15.7% - 57%     | 16.1%<br>7.4% - 26.8%  |
| <b>EC Coloured</b><br>Average<br>Range    | 7         | 26.8%<br>16.8% - 44.8% | 21.1%<br>6.3% - 47.8%      | 36.9%<br>6.7% - 53.1%  | 14.7%<br>0% - 23%      |
| <b>D6 Coloured</b><br>Average<br>Range    | 8         | 14.4%<br>3.8% - 24.8%  | 17.4%<br>9.2% - 29.8%      | 38.2%<br>23.6% - 53.2% | 29.4%<br>16.6% - 51.6% |
| <b>Total Coloured</b><br>Average<br>Range | 25        | 25.3%<br>3.8% - 55.8%  | 15.5%<br>3.5% - 47.8%      | 38.5%<br>6.7% - 57%    | 19.9%<br>0% - 51.6%    |

\*N = Number of samples per population group
