# Supplementary material for: Complex Patterns of Genomic Admixture within Southern Africa
Source: PubMed Central journal article supplement (PMC3597481; doi:10.1371/journal.pgen.1003309), 2013-03-14
Supplement: pgen.1003309.s023.pdf [file pgen.1003309.s023.pdf]

**Table S13.** Significance of ancestral contributions within southern Africans from our study.<sup>1</sup>

| <b>Population</b>           | <b>Indian (IND)</b> | <b>Indonesian (IDO)</b> | <b>European (CEU)</b> | <b>Khoesan (SAN)</b> | <b>Yoruba (YRI)</b> | <b>Han Chinese (CBH)</b> |
|-----------------------------|---------------------|-------------------------|-----------------------|----------------------|---------------------|--------------------------|
| <b>Total Coloured</b>       | 0.28                | 0.24                    | 0.96                  | 0.88                 | 0.8                 | 0.04                     |
| <b>D6-Coloured</b>          | 0.63                | 0.5                     | 1                     | 0.63                 | 0.88                | 0                        |
| <b>EC-Coloured</b>          | 0.14                | 0.14                    | 0.86                  | 1                    | 1                   | 0                        |
| <b>NC-Coloured</b>          | 0.1                 | 0.1                     | 1                     | 1                    | 0.6                 | 0.1                      |
| <b>Baster</b>               | 0.07                | 0.03                    | 1                     | 1                    | 0.5                 | 0.07                     |
| <b>amaXhosa</b>             | 0                   | 0.07                    | 0.13                  | 1                    | 1                   | 0                        |
| <b>!Xun</b>                 | 0                   | 0.07                    | 0                     | 1                    | 0.93                | 0                        |
| <b>#Khomani<sup>2</sup></b> | 0.29                | 0.06                    | 0.52                  | 1                    | 0.52                | 0.03                     |

<sup>1</sup> A value of 1.0 indicates that all subjects within the population identifier carried an ancestral contribution

<sup>2</sup> Published data, Henn et al., 2011
