# Supplementary material for: Complex Patterns of Genomic Admixture within Southern Africa
Source: PubMed Central journal article supplement (PMC3597481; doi:10.1371/journal.pgen.1003309), 2013-03-14
Supplement: pgen.1003309.s024.pdf [file pgen.1003309.s024.pdf]

**Table S14.** Primer sequences and amplification conditions for gender-specific markers

| DNA   | Haplogroup | Marker            | Primers                                                                                                                                               |
|-------|------------|-------------------|-------------------------------------------------------------------------------------------------------------------------------------------------------|
| mt    | L0         | C3516A            | 3322-F 5'-CTCCTACTCCTCATTGTACC-3'<br>4162-R 5'-TGAGTTGGTCGTAGCGGAAT-3'                                                                                |
| mt    | L0d        | T4232C            | 4040-F 5'-CAACATATGACGCACTCTCC-3'<br>5995-R 5'-GTGCCTAGGACTCCAGCTCA-3'                                                                                |
| mt    | L0k        | G4541A            | 4040-F 5'-CAACATATGACGCACTCTCC-3'<br>5995-R 5'-GTGCCTAGGACTCCAGCTCA-3'                                                                                |
| mt    | L0a        | G5231A<br>G11176A | 4838-F 5'-TCTGACATCCGGCCTGCTTC-3'<br>5995-R 5'-GTGCCTAGGACTCCAGCTCA-3'<br>10961-F 5'-CTAACTACCTGACTCCTACC-3'<br>Amp2-R 5' TTACTTTTATTTGGAGTTGCACCA-3' |
| mt    | L2         | T10115C           | 9378-F 5'-TGGCGCGATGTAACACGAGA-3'<br>10380-R 5'-GTAGTCACTCATAGGCCAGA-3'                                                                               |
| mt    | L3'4       | T3594C            | 3322-F 5'-CTCCTACTCCTCATTGTACC-3'<br>4162-R 5'-TGAGTTGGTCGTAGCGGAAT-3'                                                                                |
| mt    | L3         | A1018G            | 751-F 5'-ACAAGCATCAAGCACGCAGC-3'<br>1721-R 5'-GGCTAAGGTTGTCTGGTAGT-3'                                                                                 |
| mt    | M          | C10400T           | 10131-F 5'-CCACAACCTCAACGGCTACAT-3'<br>Amp2-R 5' TTACTTTTATTTGGAGTTGCACCA-3'                                                                          |
| mt    | N          | G10398A           | 10131-F 5'-CCACAACCTCAACGGCTACAT-3'<br>Amp2-R 5' TTACTTTTATTTGGAGTTGCACCA-3'                                                                          |
| Y-chr | E1b1b      | M215              | M215-F 5'-CATCCCATGAAATATACACAGAAAC-3'<br>M215-R 5'-AGTGAGCAGAGATTGCACCA-3'<br>M215-seq 5'-AGATTAAACTTTGATTATATTAAT-3'                                |

**Amplification conditions:**

**mtDNA:** Roche Fast-Start PCR protocol, annealing temperature set at 60°C

**Y-Chr:** Roche Fast-Start PCR protocol, annealing temperature set at 56°C. The 430 bp amplicon was first excised from a 2% agarose gel (QIAquick Gel Extraction Kit, Qiagen) prior to sequencing.
