# Supplementary material for: Complex Patterns of Genomic Admixture within Southern Africa
Source: PLoS Genet. 2013 Mar 14;9(3):e1003309. doi: 10.1371/journal.pgen.1003309 (PMC3597481; doi:10.1371/journal.pgen.1003309)
Supplement: Table S4 — Fixed Ju/'hoan-specific alleles. Of the 2,687 ancestry informative Ju/'hoan-Yoruba markers (AIMs), 32 were found to be fixed in the Ju/'hoan (n = 19), 16 occurring in gene regions of potential functional relevance. Of the 16 fixed Ju/'hoan alleles, 13 are defined as ancestral against the Pan (Chimp) genome. (PDF) [file pgen.1003309.s014.pdf]

Petersen DC, et al. **Complex Patterns of Genomic Admixture within Southern Africa**

**Table S4. Fixed Ju/'hoan-specific alleles.** Of the 2,687 ancestry informative Ju/'hoan-Yoruba markers (AIMs), 32 were found to be fixed in the Ju/'hoan (n=19), 16 occurring in gene regions of potential functional relevance. Of the 16 fixed Ju/'hoan alleles, 13 are defined as ancestral against the *Pan* (Chimp) genome.

| Gene relevant SNP | Chr | Position <sup>1</sup> | Gene            | Location   | Function <sup>2</sup>                                                                                                                                                              | Genetic Association Class (Phenotype) <sup>3</sup>                                                                                                                                                                                                                                                 | Pan allele | Southern African Populations (our data) |                      |                      | HapMap Populations (published) |                      |                      |
|-------------------|-----|-----------------------|-----------------|------------|------------------------------------------------------------------------------------------------------------------------------------------------------------------------------------|----------------------------------------------------------------------------------------------------------------------------------------------------------------------------------------------------------------------------------------------------------------------------------------------------|------------|-----------------------------------------|----------------------|----------------------|--------------------------------|----------------------|----------------------|
|                   |     |                       |                 |            |                                                                                                                                                                                    |                                                                                                                                                                                                                                                                                                    |            | Ju/'hoan (n=19) 'Fixed'                 | !Xun (n=14)          | Xhosa (n=15)         | Yoruba (n=90)                  | Asian (n=44)         | European (n=175)     |
| rs3767216         | 1   | 20012927 [20140340]   | <i>RNF186</i>   | Downstream | Ring finger protein involved in protein ubiquitination and diverse cellular processes.                                                                                             | <i>Immune (Ulcerative Colitis)</i>                                                                                                                                                                                                                                                                 | A          | A                                       | A(0.714)<br>G(0.286) | A(0.500)<br>G(0.500) | A(0.400)<br>G(0.600)           | A(0.364)<br>G(0.636) | A(0.686)<br>G(0.314) |
| rs6662137         | 1   | 216608682 [218542059] | <i>TGFB2</i>    | Intronic   | Cellular functions including regulating proliferation, differentiation, adhesion, and migration in many cell types. Suppresses the effects of interleukin dependent T-cell tumors. | <i>Cancer (Ovarian / Breast); Infection (Hepatitis C / Malaria); Immune (Asthma / MS / Lupus / Celiac disease); Cardiovascular (atherosclerosis); Chemical dependency (alcohol); Metabolic (obesity / bone density); Aging (kidney again); Vision (myopia); Developmental (cleft palate)</i>       | G          | G                                       | G(0.857)<br>T(0.143) | G(0.700)<br>T(0.300) | G(0.589)<br>T(0.411)           | G(0.352)<br>T(0.648) | G(0.306)<br>T(0.694) |
| rs13432082        | 2   | 230609891 [230901647] | <i>SLC16A14</i> | 3'UTR      | Proton-linked monocarboxylate transporter.                                                                                                                                         | None                                                                                                                                                                                                                                                                                               | A          | A                                       | A(0.964)<br>G(0.036) | A(0.767)<br>G(0.233) | A(0.344)<br>G(0.656)           | A(0.852)<br>G(0.148) | A(0.731)<br>G(0.269) |
| rs5011271         | 6   | 46250398 [46142439]   | <i>ENPP5</i>    | Promoter   | Ectonucleotide pyrophosphatase /phosphodiesterase 5 with hydrolase activity. May play a role in neuronal cell communication.                                                       | None                                                                                                                                                                                                                                                                                               | A          | A                                       | A(0.893)<br>G(0.107) | A(0.833)<br>G(0.167) | A(0.561)<br>G(0.439)           | A(0.636)<br>G(0.364) | A(0.620)<br>G(0.380) |
| rs10253875        | 7   | 1059515 [1092989]     | <i>C7orf50</i>  | Intronic   | Protein binding and unknown function.                                                                                                                                              | None                                                                                                                                                                                                                                                                                               | A          | A                                       | A<br>'Fixed'         | A(0.667)<br>G(0.333) | A(0.439)<br>G(0.561)           | A<br>'Fixed'         | A<br>'Fixed'         |
| rs10263183        | 7   | 83614853 [83776917]   | <i>SEMA3A</i>   | Intronic   | Chemorepulsive agent, inhibiting axonal outgrowth, or a chemoattractive agent, stimulating the growth of apical dendrites. Vital for normal neuronal pattern development.          | <i>Chemical dependency (tobacco use); Neurological (Alzheimer's)</i>                                                                                                                                                                                                                               | T          | C<br>'Derived'                          | C<br>'Fixed'         | C(0.733)<br>T(0.267) | C(0.617)<br>T(0.383)           | C(0.784)<br>T(0.216) | C(0.863)<br>T(0.137) |
| rs1464798         | 7   | 138982540 [139332000] | <i>HIPK2</i>    | Intronic   | Protein kinase. Co-repressor of several transcription factors. Inhibits cell growth and promotes apoptosis. Involved in transcriptional activation of TP53 and TP73.               | <i>Chemical dependency (tobacco use)</i>                                                                                                                                                                                                                                                           | T          | T                                       | T(0.893)<br>C(0.107) | T(0.733)<br>C(0.267) | T(0.556)<br>C(0.444)           | T(0.102)<br>C(0.898) | T(0.429)<br>C(0.571) |
| rs1043421         | 11  | 76514209 [76836561]   | <i>CAPN5</i>    | 3'UTR      | Calpain, a calcium-dependent cysteine proteases involved in signal transduction in a variety of cellular processes.                                                                | <i>Reproduction (Polycystic Ovarian Syndrome); Cardiovascular (atherosclerosis / blood pressure); Neurological (Cognitive performance); Metabolic (obesity)</i>                                                                                                                                    | T          | T                                       | T<br>'Fixed'         | T(0.833)<br>A(0.167) | T(0.589)<br>A(0.411)           | T(0.739)<br>A(0.261) | T(0.774)<br>A(0.226) |
| rs10841661        | 12  | 20876099 [20984832]   | <i>SLCO1B3</i>  | Intronic   | Solute carrier organic anion transporter. Normally expressed in the liver and uptakes large, non-polar drugs and hormones from the portal vein.                                    | <i>Cancer (Leukemia / lymphoma / prostate / neoplasms); Infection (Tuberculosis); Metabolic (Hyperbilirubinemia); Renal (Kidney failure); Developmental (height); Pharmacogenomic (mycophenolic acid pharmacokines / drug-related genes / docetaxel elimination / paclitaxel pharmacokinetics)</i> | T          | T                                       | T(0.857)<br>C(0.143) | T(0.700)<br>C(0.300) | T(0.589)<br>C(0.411)           | T(0.341)<br>C(0.659) | T(0.440)<br>C(0.560) |

|            |    |                        |        |                        |                                                                                                                                                                                                                                                                               |                                                                                                                                                              |   |                |                        |                      |                      |                      |                      |
|------------|----|------------------------|--------|------------------------|-------------------------------------------------------------------------------------------------------------------------------------------------------------------------------------------------------------------------------------------------------------------------------|--------------------------------------------------------------------------------------------------------------------------------------------------------------|---|----------------|------------------------|----------------------|----------------------|----------------------|----------------------|
| rs9566462  | 13 | 39067423<br>[40169423] | LHFP   | Intronic               | Tetraspan transmembrane protein. A fusion partner of <i>HMGIC</i> gene in a translocation-associated lipoma t(12;13).                                                                                                                                                         | None                                                                                                                                                         | C | T<br>'Derived' | T(0.857)<br>C(0.143)   | T(0.633)<br>C(0.367) | T(0.589)<br>C(0.411) | T(0.205)<br>C(0.795) | T(0.177)<br>C(0.823) |
| rs2070342  | 14 | 23615206<br>[24545366] | CPNE6  | Coding<br>(synonymous) | A brain-specific member of the copine family, which is composed of calcium-dependent membrane-binding proteins. Contains two N-terminal C2 domains, and one von Willebrand factor A domain. May have a role in synaptic plasticity.                                           | None                                                                                                                                                         | G | G              | G(0.964)<br>A(0.036)   | G(0.733)<br>A(0.267) | G(0.550)<br>A(0.450) | G(0.386)<br>A(0.614) | G(0.386)<br>A(0.614) |
| rs17126976 | 14 | 90255620<br>[91185867] | TTC7B  | Intronic               | Tetratricopeptide repeat protein 7B. Participates in host cellular shutoff mediated by the Chikungunya virus (CHIKV) viral nonstructural protein nsP2 (previously reported for other Old World alphaviruses).                                                                 | None                                                                                                                                                         | A | A              | A (0.846)<br>G (0.154) | A(0.767)<br>G(0.233) | A(0.589)<br>G(0.411) | A(0.955)<br>G(0.045) | A(0.799)<br>G(0.201) |
| rs16966391 | 15 | 31264514<br>[33477222] | FMN1   | Intronic               | Formin protein involved in the formation of adherens junction and the polymerization of linear actin cables.                                                                                                                                                                  | <i>Cancer (prostate cancer); Chemical dependency (tobacco use); Developmental (cleft palate); Alcohol associated pancreatitis</i>                            | T | C<br>'Derived' | C(0.643)<br>T(0.357)   | C(0.800)<br>T(0.200) | C(0.533)<br>T(0.467) | C(0.852)<br>T(0.148) | C(0.940)<br>T(0.060) |
| rs1425287  | 15 | 58783129<br>[60995837] | RORA   | Intronic               | Orphan nuclear receptor that binds DNA as a monomer to hormone response elements (HREs) containing a single core motif half-site followed by a short AT-rich sequence. Regulates numerous genes involved in lipid metabolism and in cerebellum and photoreceptor development. | <i>Psychological (depression / bipolar disorder); Chemical dependency (tobacco use); Sleep disorders; Pharmacogenomic (response to citalopram treatment)</i> | G | G              | G(0.929)<br>A(0.071)   | G(0.867)<br>A(0.133) | G(0.633)<br>A(0.367) | G(0.773)<br>A(0.227) | G(0.709)<br>A(0.291) |
| rs7239719  | 18 | 4194614<br>[4204614]   | DLGAP1 | Intronic               | Disks large-associated protein is found at high concentrations in synaptic junctions and forms part of the postsynaptic scaffold in neuronal cells.                                                                                                                           | <i>Chemical dependency (tobacco use)</i>                                                                                                                     | T | T              | T(0.893)<br>C(0.107)   | T(0.833)<br>C(0.167) | T(0.628)<br>C(0.372) | T(0.943)<br>C(0.057) | T(0.905)<br>C(0.095) |
| rs57531768 | 22 | 41964694<br>[43634750] | SCUBE1 | Intronic               | Cell surface glycoprotein in platelets and endothelial cells and may have an important function in vascular biology.                                                                                                                                                          | None                                                                                                                                                         | T | T              | T(0.929)<br>C(0.071)   | T(0.733)<br>C(0.267) | T(0.567)<br>C(0.433) | T(0.943)<br>C(0.057) | T(0.983)<br>C(0.017) |

<sup>1</sup> Position as defined by the HapMap Project (<http://hapmap.ncbi.nlm.nih.gov/>) and the Illumina array content (<http://www.illumina.com/science/controldb.ilmn>). The position in brackets as defined by Genome Build 37.3 used by NCBI dbSNP (<http://www.ncbi.nlm.nih.gov/projects/SNP/>) and the UCSC Genome Browser (<http://genome.ucsc.edu/>).

<sup>2</sup> Information for protein function was obtained using NCBI Gene (<http://www.ncbi.nlm.nih.gov/gene/>), NCBI OMIM (<http://www.ncbi.nlm.nih.gov/omim>) and GeneCardsV3 (<http://www.genecards.org/>).

<sup>3</sup> Previous gene-based association as defined by the Genetic Association Database (<http://geneticassociationdb.nih.gov/>), note the association is only loci relevant and not directly associated with the specific SNP listed.
